# Supplementary material
Source: PubMed Central journal article supplement (PMC3319788)
Supplement: NIHMS329196-supplement-01.pdf [file NIHMS329196-supplement-01.pdf]

Table 1. International Classification of Diseases, Ninth Revision (ICD-9-CM) Codes

| Condition                                  | ICD-9-CM Codes                                                                                                                                                                                                                                                                                                                                                                                                                                                                                                                                                                                                                                                                                                                                                                    |
|--------------------------------------------|-----------------------------------------------------------------------------------------------------------------------------------------------------------------------------------------------------------------------------------------------------------------------------------------------------------------------------------------------------------------------------------------------------------------------------------------------------------------------------------------------------------------------------------------------------------------------------------------------------------------------------------------------------------------------------------------------------------------------------------------------------------------------------------|
| Exudative Age-related macular degeneration | 362.52                                                                                                                                                                                                                                                                                                                                                                                                                                                                                                                                                                                                                                                                                                                                                                            |
| Diabetes mellitus                          | 250.0, 250.00, 250.01, 250.02, 250.03, 250.1, 250.10, 250.11, 250.12, 250.13, 250.2, 250.20, 250.21, 250.22, 250.23, 250.3, 250.30, 250.31, 250.32, 250.33, 250.4, 250.40, 250.41, 250.42, 250.43, 250.5, 250.50, 250.51, 250.52, 250.53, 250.5, 250.50, 250.51, 250.52, 250.53, 250.6, 250.60, 250.61, 250.62, 250.63, 250.7, 250.70, 250.71, 250.72, 250.73, 250.8, 250.80, 250.81, 250.82, 250.83, 250.9, 250.90, 250.91, 250.92, 250.93, 362.01, 362.02, 362.03, 362.04, 362.05, 362.06, 362.07                                                                                                                                                                                                                                                                               |
| Diabetic retinopathy                       | 362.01, 362.92, 362.03, 362.04, 362.05, 362.06, 362.07                                                                                                                                                                                                                                                                                                                                                                                                                                                                                                                                                                                                                                                                                                                            |
| Hyperlipidemia                             | 272, 272.0, 272.1, 272.2, 272.3, 272.4, 272.5, 272.6, 272.7, 272.8, 272.9                                                                                                                                                                                                                                                                                                                                                                                                                                                                                                                                                                                                                                                                                                         |
| Hypertension                               | 401, 401.0, 401.1, 401.9, 405, 405.0, 405.1, 405.01, 405.09, 405.11, 405.19, 405.9, 405.91, 405.99, 362.11, 402, 402.0, 402.00, 402.01, 402.1, 402.10, 402.11, 402.9, 402.90, 402.91, 403, 403.0, 403.00, 403.01, 403.1, 403.10, 403.11, 403.9, 403.90, 403.91, 404.0, 404.00, 404.01, 404.02, 404.03, 404.1, 404.10, 404.11, 404.12, 404.13, 404.9, 404.90, 404.91, 404.92, 404.93                                                                                                                                                                                                                                                                                                                                                                                               |
| Obesity                                    | 278.0, 278.00, 278.01, 278.02                                                                                                                                                                                                                                                                                                                                                                                                                                                                                                                                                                                                                                                                                                                                                     |
| Open-angle glaucoma                        | 365.1, 365.10, 365.11, 365.12, 365.15                                                                                                                                                                                                                                                                                                                                                                                                                                                                                                                                                                                                                                                                                                                                             |
| Suspected glaucoma                         | 365.0, 365.00, 365.01, 365.04                                                                                                                                                                                                                                                                                                                                                                                                                                                                                                                                                                                                                                                                                                                                                     |
| Other Retina Conditions                    | 115.02, 19.05, 19.06, 224.6, 228.03, 360.21, 361.00, 361.01, 361.02, 361.03, 361.04, 361.05, 361.06, 361.07, 361.2, 361.30, 361.31, 361.32, 361.33, 361.81, 361.9, 362.10, 362.11, 362.12, 362.13, 362.14, 362.15, 362.16, 362.17, 362.18, 362.21, 362.29, 362.30, 362.31, 362.32, 362.33, 362.34, 362.35, 362.36, 362.37, 362.40, 362.41, 362.42, 362.43, 362.50, 362.51, 362.54, 362.55, 362.57, 362.60, 362.61, 362.62, 362.63, 362.64, 362.65, 362.66, 362.70, 362.71, 362.72, 362.73, 362.74, 362.75, 362.76, 362.77, 362.81, 362.82, 362.84, 362.85, 363.00, 363.01, 363.02, 363.03, 363.04, 363.05, 363.06, 363.07, 363.08, 363.10, 363.11, 363.12, 363.13, 363.14, 363.15, 363.20, 363.21, 363.22, 363.31, 363.40, 363.41, 363.42, 363.43, 363.50, 363.70, 363.71, 363.72 |
| Other Conditions Affecting Optic           | 364.22, 364.53, 364.73, 364.74, 364.77, 365.02, 365.03, 365.13, 365.14, 365.20, 365.21, 365.22, 365.23, 365.24, 365.31, 365.32, 365.41, 365.42, 365.43, 365.44, 365.51, 365.52, 365.59, 365.60, 365.61, 365.62, 362.63, 365.64, 365.65, 365.81, 365.82, 365.83, 365.89, 365.9, 368.11, 368.14, 368.40, 368.41, 368.42, 368.43, 368.44, 368.45, 3                                                                                                                                                                                                                                                                                                                                                                                                                                  |

|                  |                                                                            |
|------------------|----------------------------------------------------------------------------|
| Nerve            | 77.00,377.01,377.02,377.03,377.04,377.14,377.15,377.9,743.20,743.21,743.22 |
| Macular<br>Edema | 362.07, 362.83, 362.53                                                     |
