# Supplementary material
Source: PubMed Central journal article supplement (PMC3319788)
Supplement: NIHMS329196-supplement-02.pdf [file NIHMS329196-supplement-02.pdf]

**Table 8: Logistic for other ocular imaging testing for those under the exclusive care of optometrists**

| Model Information           |          |
|-----------------------------|----------|
| Distribution                | Binomial |
| Link Function               | Logit    |
| Number of Observations Used | 338783   |
| Number of Events            | 48469    |
| Number of Trials            | 338783   |
| Missing Values              | 40       |

| Response Profile |                    |                 |
|------------------|--------------------|-----------------|
| Ordered Value    | Dependent variable | Total Frequency |
| 1                | 1                  | 48469           |
| 2                | 0                  | 290314          |

PROC GENMOD is modeling the probability that dependent variable='1'.

| Generalized Estimating Equations Model Information |                 |
|----------------------------------------------------|-----------------|
| Correlation Structure                              | 8-Dependent     |
| Within-Subject Effect                              | year (9 levels) |

| Generalized Estimating Equations Fit Criteria |             |
|-----------------------------------------------|-------------|
| Quasi-likelihood Information Criterion (QIC)  | 240249.5099 |

| Score Statistics For Type 3 Generalized Estimating Equations Analysis |                    |            |         |
|-----------------------------------------------------------------------|--------------------|------------|---------|
| Source                                                                | Degrees of Freedom | Chi-Square | p-value |
| Year                                                                  | 1                  | 51.02      | <.0001  |
| Year-squared                                                          | 1                  | 34.78      | <.0001  |
| Open-angle glaucoma                                                   | 1                  | 400.39     | <.0001  |
| Year*Open-angle glaucoma                                              | 1                  | 4.69       | 0.0303  |
| Year-squared*Open-angle glaucoma                                      | 1                  | 5.43       | 0.0198  |
| Glaucoma suspect                                                      | 1                  | 325.12     | <.0001  |
| Year*Glaucoma suspect                                                 | 1                  | 2.49       | 0.1143  |
| Year-squared*Glaucoma suspect                                         | 1                  | 0.09       | 0.7613  |
| Macular Edema                                                         | 1                  | 3.83       | 0.0505  |
| Year*Macular Edema                                                    | 1                  | 0.04       | 0.8349  |
| Year-squared*Macular Edema                                            | 1                  | 0          | 0.9439  |
| Exudative Macular degeneration                                        | 1                  | 6.96       | 0.0083  |
| Year*Exudative Macular degeneration                                   | 1                  | 8.87       | 0.0029  |

|                                                                     |   |         |        |
|---------------------------------------------------------------------|---|---------|--------|
| <b>Year-squared*Exudative Macular degeneration</b>                  | 1 | 5.71    | 0.0169 |
| <b>Other retina conditions</b>                                      | 1 | 8.05    | 0.0046 |
| <b>Year*Other retinal conditions</b>                                | 1 | 0.02    | 0.8858 |
| <b>Year-squared*Other retinal conditions</b>                        | 1 | 2.3     | 0.1295 |
| <b>Other nerve conditions</b>                                       | 1 | 52.13   | <.0001 |
| <b>Year*Other nerve conditions</b>                                  | 1 | 0.84    | 0.3607 |
| <b>Year-squared*Other nerve conditions</b>                          | 1 | 0       | 0.9568 |
| <b>Non-Proliferative Diabetic Retinopathy</b>                       | 1 | 29.12   | <.0001 |
| <b>Proliferative Diabetic Retinopathy</b>                           | 1 | 1.21    | 0.2709 |
| <b>Race</b>                                                         | 4 | 14.82   | 0.0051 |
| <b>Insurance type</b>                                               | 2 | 32.3    | <.0001 |
| <b>Sex</b>                                                          | 1 | 39.56   | <.0001 |
| <b>Education</b>                                                    | 4 | 4.09    | 0.394  |
| <b>Household Net Worth</b>                                          | 4 | 14.29   | 0.0064 |
| <b>US Region of residence</b>                                       | 4 | 129.87  | <.0001 |
| <b>Insurance plan</b>                                               | 5 | 90.04   | <.0001 |
| <b>Age</b>                                                          | 1 | 3.7     | 0.0546 |
| <b>Obesity</b>                                                      | 1 | 23.99   | <.0001 |
| <b>Hypertension</b>                                                 | 1 | 3.47    | 0.0624 |
| <b>Hyperlipidemia</b>                                               | 1 | 9.81    | 0.0017 |
| <b>Amount of time the person was covered under the plan (years)</b> | 1 | 2298.68 | <.0001 |

| <b>Parameter estimates</b>          |                 |                              |                               |                                                              |                                                              |                |
|-------------------------------------|-----------------|------------------------------|-------------------------------|--------------------------------------------------------------|--------------------------------------------------------------|----------------|
| <b>Parameter</b>                    | <b>Estimate</b> | <b>Std error of estimate</b> | <b>Exponentiated estimate</b> | <b>95% lower confidence limit for exponentiated estimate</b> | <b>95% upper confidence limit for exponentiated estimate</b> | <b>p-value</b> |
| Intercept                           | -6.1127         | 0.1502                       | 0.0022                        | 0.0016                                                       | 0.003                                                        | <.0001         |
| Year                                | 0.3769          | 0.0505                       | 1.4577                        | 1.3204                                                       | 1.6093                                                       | <.0001         |
| Year-squared                        | -0.0296         | 0.0048                       | 0.9709                        | 0.9618                                                       | 0.9801                                                       | <.0001         |
| Open-angle glaucoma                 | 3.0895          | 0.1347                       | 21.9671                       | 16.8685                                                      | 28.6068                                                      | <.0001         |
| Year*Open-angle glaucoma            | -0.1217         | 0.0533                       | 0.8854                        | 0.7976                                                       | 0.9829                                                       | 0.0224         |
| Year-squared*Open-angle glaucoma    | 0.0124          | 0.0051                       | 1.0125                        | 1.0025                                                       | 1.0227                                                       | 0.0146         |
| Glaucoma suspect                    | 2.6083          | 0.1277                       | 13.5766                       | 10.5703                                                      | 17.4378                                                      | <.0001         |
| Year*Glaucoma suspect               | -0.0839         | 0.0501                       | 0.9195                        | 0.8335                                                       | 1.0143                                                       | 0.0938         |
| Year-squared*Glaucoma suspect       | 0.0015          | 0.0048                       | 1.0015                        | 0.9922                                                       | 1.0109                                                       | 0.7474         |
| Macular Edema                       | 1.3054          | 0.4407                       | 3.6891                        | 1.5551                                                       | 8.7514                                                       | 0.0031         |
| Year*Macular Edema                  | 0.0386          | 0.1699                       | 1.0394                        | 0.745                                                        | 1.45                                                         | 0.8201         |
| Year-squared*Macular Edema          | -0.0012         | 0.0159                       | 0.9988                        | 0.9682                                                       | 1.0304                                                       | 0.9391         |
| Exudative Macular degeneration      | -1.9598         | 0.7862                       | 0.1409                        | 0.0302                                                       | 0.6577                                                       | 0.0127         |
| Year*Exudative Macular degeneration | 0.9101          | 0.3013                       | 2.4846                        | 1.3766                                                       | 4.4846                                                       | 0.0025         |
| Year-squared*Exudative Macular      | -0.0692         | 0.0278                       | 0.9331                        | 0.8836                                                       | 0.9854                                                       | 0.0128         |

|                                                            |         |        |        |        |        |        |
|------------------------------------------------------------|---------|--------|--------|--------|--------|--------|
| degeneration                                               |         |        |        |        |        |        |
| Other retina conditions                                    | -0.3464 | 0.1206 | 0.7073 | 0.5584 | 0.8958 | 0.0041 |
| Year*Other retinal conditions                              | -0.0069 | 0.0462 | 0.9931 | 0.907  | 1.0873 | 0.8809 |
| Year-squared*Other retinal conditions                      | 0.0068  | 0.0043 | 1.0069 | 0.9984 | 1.0154 | 0.1128 |
| Other nerve conditions                                     | 0.6248  | 0.0772 | 1.8678 | 1.6056 | 2.1728 | <.0001 |
| Year*Other nerve conditions                                | -0.0302 | 0.0316 | 0.9702 | 0.912  | 1.0322 | 0.3388 |
| Year-squared*Other nerve conditions                        | 0.0002  | 0.0031 | 1.0002 | 0.9941 | 1.0062 | 0.9553 |
| Non-Proliferative Diabetic Retinopathy                     | 0.2506  | 0.044  | 1.2848 | 1.1787 | 1.4005 | <.0001 |
| Proliferative Diabetic Retinopathy                         | 0.2262  | 0.1947 | 1.2538 | 0.8561 | 1.8363 | 0.2453 |
| Race: Blacks (vs Whites)                                   | -0.0826 | 0.0268 | 0.9207 | 0.8736 | 0.9704 | 0.0021 |
| Race: Latinos (vs Whites)                                  | 0.059   | 0.0299 | 1.0608 | 1.0004 | 1.1248 | 0.0483 |
| Race: Asians (vs Whites)                                   | -0.0141 | 0.0473 | 0.986  | 0.8987 | 1.0818 | 0.7651 |
| Race: Other races (vs Whites)                              | 0.0054  | 0.073  | 1.0054 | 0.8713 | 1.1601 | 0.9415 |
| Insurance type: Commercial & Medicaid (vs Commercial only) | -0.272  | 0.0653 | 0.7619 | 0.6704 | 0.8658 | <.0001 |
| Insurance type: Commercial & Medicare (vs Commercial only) | -0.1654 | 0.0413 | 0.8476 | 0.7816 | 0.9191 | <.0001 |
| Sex: Females (vs Males)                                    | 0.0802  | 0.0128 | 1.0835 | 1.0568 | 1.111  | <.0001 |
| Education: High school diploma (vs less than High School)  | -0.027  | 0.0559 | 0.9734 | 0.8724 | 1.0861 | 0.6293 |
| Education: Some college (vs less than High School)         | 0.0016  | 0.0567 | 1.0016 | 0.8963 | 1.1192 | 0.978  |
| Education: College diploma (vs less than High School)      | 0.0056  | 0.0586 | 1.0057 | 0.8966 | 1.128  | 0.9234 |
| Education: Advanced degree (vs less than High School)      | -0.0143 | 0.1995 | 0.9858 | 0.6668 | 1.4574 | 0.9428 |
| Household Net Worth: 25K-75K (vs <25K)                     | 0.0056  | 0.031  | 1.0056 | 0.9464 | 1.0686 | 0.8559 |
| Household Net Worth: 75K-150K (vs <25K)                    | 0.0655  | 0.0266 | 1.0677 | 1.0134 | 1.1249 | 0.0139 |
| Household Net Worth: 150K-500K (vs <25K)                   | 0.0724  | 0.024  | 1.0751 | 1.0257 | 1.127  | 0.0026 |
| Household Net Worth: >500K (vs <25K)                       | 0.0775  | 0.0293 | 1.0806 | 1.0203 | 1.1444 | 0.0081 |
| US Region of residence: South-East (vs North-East)         | 0.0516  | 0.0186 | 1.053  | 1.0152 | 1.0922 | 0.0056 |
| US Region of residence: Mid-West (vs North-East)           | -0.1139 | 0.019  | 0.8923 | 0.8598 | 0.9262 | <.0001 |
| US Region of residence: West (vs North-East)               | 0.0618  | 0.0273 | 1.0637 | 1.0083 | 1.1221 | 0.0235 |
| US Region of residence: Other regions (vs North-East)      | 0.0193  | 0.2489 | 1.0195 | 0.6259 | 1.6607 | 0.9381 |
| Insurance Plan: PPO (vs HMO)                               | 0.1461  | 0.023  | 1.1574 | 1.1064 | 1.2107 | <.0001 |
| Insurance Plan: EPO (vs HMO)                               | 0.1383  | 0.024  | 1.1484 | 1.0955 | 1.2038 | <.0001 |
| Insurance Plan: POS (vs HMO)                               | 0.1558  | 0.0177 | 1.1686 | 1.1288 | 1.2099 | <.0001 |
| Insurance Plan: IND (vs HMO)                               | 0.0214  | 0.0405 | 1.0217 | 0.9437 | 1.106  | 0.5967 |
| Insurance Plan: Other plans (vs HMO)                       | 0.0684  | 0.0994 | 1.0708 | 0.8812 | 1.3011 | 0.4915 |
| Age                                                        | 0.0016  | 0.0008 | 1.0016 | 1      | 1.0033 | 0.0535 |
| Obesity                                                    | -0.0951 | 0.0197 | 0.9093 | 0.8749 | 0.945  | <.0001 |
| Hypertension                                               | -0.0272 | 0.0145 | 0.9732 | 0.9459 | 1.0013 | 0.0618 |
| Hyperlipidemia                                             | 0.0451  | 0.0144 | 1.0461 | 1.017  | 1.076  | 0.0017 |

|                                                              |        |        |        |       |        |        |
|--------------------------------------------------------------|--------|--------|--------|-------|--------|--------|
| Amount of time the person was covered under the plan (years) | 1.3178 | 0.0313 | 3.7351 | 3.513 | 3.9712 | <.0001 |
|--------------------------------------------------------------|--------|--------|--------|-------|--------|--------|

HMO = health maintenance organization

IND = indemnity plan

PPO = preferred provider organization

EPO = exclusive provider organization

The fitted model coefficients reported here were used to predict odds (or probabilities) of the outcome for different groups of enrollees in different years. Various comparisons were then made between the estimated odds and these comparative odds were reported in the paper. While estimating these odds, all other predictors were assumed to be at their average value or reference value.

**Table 9: Logistic for other ocular imaging testing for those under the exclusive care of ophthalmologists**

| Model Information           |          |
|-----------------------------|----------|
| Distribution                | Binomial |
| Link Function               | Logit    |
| Number of Observations Used | 1546292  |
| Number of Events            | 297317   |
| Number of Trials            | 1546292  |
| Missing Values              | 153      |

| Response Profile |                    |                 |
|------------------|--------------------|-----------------|
| Ordered Value    | Dependent variable | Total Frequency |
| 1                | 1                  | 297317          |
| 2                | 0                  | 1248975         |

PROC GENMOD is modeling the probability that dependent variable='1'.

| Generalized Estimating Equations Model Information |                 |
|----------------------------------------------------|-----------------|
| Correlation Structure                              | 8-Dependent     |
| Within-Subject Effect                              | year (9 levels) |

| Generalized Estimating Equations Fit Criteria |             |
|-----------------------------------------------|-------------|
| Quasi-likelihood Information Criterion (QIC)  | 1311243.053 |

| Score Statistics For Type 3 Generalized Estimating Equations Analysis |                    |            |         |
|-----------------------------------------------------------------------|--------------------|------------|---------|
| Source                                                                | Degrees of Freedom | Chi-Square | p-value |
| Year                                                                  | 1                  | 758.84     | <.0001  |
| Year-squared                                                          | 1                  | 328.89     | <.0001  |
| Open-angle glaucoma                                                   | 1                  | 5290.16    | <.0001  |
| Year*Open-angle glaucoma                                              | 1                  | 140.86     | <.0001  |
| Year-squared*Open-angle glaucoma                                      | 1                  | 54.05      | <.0001  |
| Glaucoma suspect                                                      | 1                  | 4707.37    | <.0001  |
| Year*Glaucoma suspect                                                 | 1                  | 337.48     | <.0001  |
| Year-squared*Glaucoma suspect                                         | 1                  | 98.03      | <.0001  |
| Macular Edema                                                         | 1                  | 131.98     | <.0001  |
| Year*Macular Edema                                                    | 1                  | 122.32     | <.0001  |
| Year-squared*Macular Edema                                            | 1                  | 135.06     | <.0001  |

|                                                                     |   |         |        |
|---------------------------------------------------------------------|---|---------|--------|
| <b>Exudative Macular degeneration</b>                               | 1 | 1.21    | 0.2706 |
| <b>Year*Exudative Macular degeneration</b>                          | 1 | 112.02  | <.0001 |
| <b>Year-squared*Exudative Macular degeneration</b>                  | 1 | 21.5    | <.0001 |
| <b>Other retina conditions</b>                                      | 1 | 110.46  | <.0001 |
| <b>Year*Other retinal conditions</b>                                | 1 | 19.39   | <.0001 |
| <b>Year-squared*Other retinal conditions</b>                        | 1 | 0.39    | 0.5312 |
| <b>Other nerve conditions</b>                                       | 1 | 343.24  | <.0001 |
| <b>Year*Other nerve conditions</b>                                  | 1 | 133.59  | <.0001 |
| <b>Year-squared*Other nerve conditions</b>                          | 1 | 79.17   | <.0001 |
| <b>Non-Proliferative Diabetic Retinopathy</b>                       | 1 | 662.2   | <.0001 |
| <b>Proliferative Diabetic Retinopathy</b>                           | 1 | 206.29  | <.0001 |
| <b>Race</b>                                                         | 4 | 15.31   | 0.0041 |
| <b>Insurance type</b>                                               | 2 | 177.25  | <.0001 |
| <b>Sex</b>                                                          | 1 | 18.34   | <.0001 |
| <b>Education</b>                                                    | 4 | 174.32  | <.0001 |
| <b>Household Net Worth</b>                                          | 4 | 183.34  | <.0001 |
| <b>US Region of residence</b>                                       | 4 | 716.16  | <.0001 |
| <b>Insurance plan</b>                                               | 5 | 224.87  | <.0001 |
| <b>Age</b>                                                          | 1 | 7.73    | 0.0054 |
| <b>Obesity</b>                                                      | 1 | 49.16   | <.0001 |
| <b>Hypertension</b>                                                 | 1 | 1.23    | 0.2676 |
| <b>Hyperlipidemia</b>                                               | 1 | 62      | <.0001 |
| <b>Amount of time the person was covered under the plan (years)</b> | 1 | 15954.2 | <.0001 |

| <b>Parameter estimates</b>       |                 |                              |                               |                                                              |                                                              |                |
|----------------------------------|-----------------|------------------------------|-------------------------------|--------------------------------------------------------------|--------------------------------------------------------------|----------------|
| <b>Parameter</b>                 | <b>Estimate</b> | <b>Std error of estimate</b> | <b>Exponentiated estimate</b> | <b>95% lower confidence limit for exponentiated estimate</b> | <b>95% upper confidence limit for exponentiated estimate</b> | <b>p-value</b> |
| Intercept                        | -5.7222         | 0.0491                       | 0.0033                        | 0.003                                                        | 0.0036                                                       | <.0001         |
| Year                             | 0.4159          | 0.0148                       | 1.5157                        | 1.4723                                                       | 1.5603                                                       | <.0001         |
| Year-squared                     | -0.0273         | 0.0015                       | 0.9731                        | 0.9703                                                       | 0.9759                                                       | <.0001         |
| Open-angle glaucoma              | 2.7286          | 0.0363                       | 15.3111                       | 14.2599                                                      | 16.4397                                                      | <.0001         |
| Year*Open-angle glaucoma         | -0.1853         | 0.015                        | 0.8308                        | 0.8068                                                       | 0.8556                                                       | <.0001         |
| Year-squared*Open-angle glaucoma | 0.0114          | 0.0015                       | 1.0114                        | 1.0085                                                       | 1.0144                                                       | <.0001         |
| Glaucoma suspect                 | 2.5963          | 0.0362                       | 13.4134                       | 12.4949                                                      | 14.3995                                                      | <.0001         |
| Year*Glaucoma suspect            | -0.2848         | 0.015                        | 0.7522                        | 0.7304                                                       | 0.7746                                                       | <.0001         |
| Year-squared*Glaucoma suspect    | 0.0152          | 0.0015                       | 1.0153                        | 1.0124                                                       | 1.0183                                                       | <.0001         |
| Macular Edema                    | 0.9528          | 0.0675                       | 2.5931                        | 2.2718                                                       | 2.9599                                                       | <.0001         |
| Year*Macular Edema               | 0.3149          | 0.0273                       | 1.3702                        | 1.2988                                                       | 1.4455                                                       | <.0001         |

|                                                            |         |        |        |        |        |        |
|------------------------------------------------------------|---------|--------|--------|--------|--------|--------|
| Year-squared*Macular Edema                                 | -0.0316 | 0.0026 | 0.9689 | 0.9639 | 0.974  | <.0001 |
| Exudative Macular degeneration                             | -0.0977 | 0.0812 | 0.9069 | 0.7735 | 1.0633 | 0.2288 |
| Year*Exudative Macular degeneration                        | 0.3512  | 0.0332 | 1.4208 | 1.3312 | 1.5163 | <.0001 |
| Year-squared*Exudative Macular degeneration                | -0.0153 | 0.0032 | 0.9848 | 0.9786 | 0.991  | <.0001 |
| Other retina conditions                                    | -0.3021 | 0.0281 | 0.7392 | 0.6996 | 0.7811 | <.0001 |
| Year*Other retinal conditions                              | 0.0537  | 0.0119 | 1.0551 | 1.0309 | 1.08   | <.0001 |
| Year-squared*Other retinal conditions                      | -0.0008 | 0.0012 | 0.9992 | 0.9969 | 1.0016 | 0.5215 |
| Other nerve conditions                                     | 0.448   | 0.0223 | 1.5652 | 1.4983 | 1.6352 | <.0001 |
| Year*Other nerve conditions                                | -0.1184 | 0.0098 | 0.8883 | 0.8714 | 0.9056 | <.0001 |
| Year-squared*Other nerve conditions                        | 0.0093  | 0.001  | 1.0093 | 1.0073 | 1.0113 | <.0001 |
| Non-Proliferative Diabetic Retinopathy                     | 0.345   | 0.0126 | 1.4119 | 1.3774 | 1.4474 | <.0001 |
| Proliferative Diabetic Retinopathy                         | 0.3202  | 0.0213 | 1.3774 | 1.321  | 1.4362 | <.0001 |
| Race: Blacks (vs Whites)                                   | -0.0051 | 0.0111 | 0.9949 | 0.9735 | 1.0168 | 0.6443 |
| Race: Latinos (vs Whites)                                  | 0.0348  | 0.0116 | 1.0355 | 1.0123 | 1.0592 | 0.0026 |
| Race: Asians (vs Whites)                                   | 0.0327  | 0.0153 | 1.0333 | 1.0027 | 1.0647 | 0.0324 |
| Race: Other races (vs Whites)                              | 0.0441  | 0.0283 | 1.0451 | 0.9888 | 1.1046 | 0.1188 |
| Insurance type: Commercial & Medicaid (vs Commercial only) | -0.3058 | 0.0342 | 0.7366 | 0.6888 | 0.7876 | <.0001 |
| Insurance type: Commercial & Medicare (vs Commercial only) | -0.1692 | 0.0158 | 0.8444 | 0.8186 | 0.8709 | <.0001 |
| Sex: Females (vs Males)                                    | 0.0246  | 0.0057 | 1.0249 | 1.0135 | 1.0364 | <.0001 |
| Education: High school diploma (vs less than High School)  | 0.0419  | 0.0229 | 1.0428 | 0.9971 | 1.0907 | 0.0667 |
| Education: Some college (vs less than High School)         | 0.0296  | 0.0231 | 1.03   | 0.9844 | 1.0778 | 0.2008 |
| Education: College diploma (vs less than High School)      | -0.0552 | 0.0238 | 0.9463 | 0.9031 | 0.9915 | 0.0205 |
| Education: Advanced degree (vs less than High School)      | -0.2527 | 0.0523 | 0.7767 | 0.701  | 0.8605 | <.0001 |
| Household Net Worth: 25K-75K (vs <25K)                     | 0.0169  | 0.0155 | 1.017  | 0.9865 | 1.0484 | 0.2775 |
| Household Net Worth: 75K-150K (vs <25K)                    | 0.0688  | 0.0134 | 1.0712 | 1.0434 | 1.0997 | <.0001 |
| Household Net Worth: 150K-500K (vs <25K)                   | 0.1058  | 0.0117 | 1.1117 | 1.0864 | 1.1375 | <.0001 |
| Household Net Worth: >500K (vs <25K)                       | 0.1543  | 0.0132 | 1.1669 | 1.1371 | 1.1974 | <.0001 |
| US Region of residence: South-East (vs North-East)         | 0.0518  | 0.008  | 1.0532 | 1.0368 | 1.0697 | <.0001 |
| US Region of residence: Mid-West (vs North-East)           | -0.1396 | 0.0089 | 0.8697 | 0.8546 | 0.8851 | <.0001 |
| US Region of residence: West (vs North-East)               | 0.0429  | 0.0101 | 1.0438 | 1.0234 | 1.0646 | <.0001 |
| US Region of residence: Other regions (vs North-East)      | -0.08   | 0.1058 | 0.9231 | 0.7503 | 1.1358 | 0.4495 |
| Insurance Plan: PPO (vs HMO)                               | 0.0022  | 0.0109 | 1.0022 | 0.9809 | 1.0239 | 0.8425 |
| Insurance Plan: EPO (vs HMO)                               | 0.0514  | 0.0121 | 1.0528 | 1.0281 | 1.0781 | <.0001 |
| Insurance Plan: POS (vs HMO)                               | 0.0447  | 0.0094 | 1.0458 | 1.0267 | 1.0652 | <.0001 |
| Insurance Plan: IND (vs HMO)                               | -0.0964 | 0.0139 | 0.9081 | 0.8837 | 0.9331 | <.0001 |
| Insurance Plan: Other plans (vs HMO)                       | -0.4163 | 0.0515 | 0.6595 | 0.5961 | 0.7295 | <.0001 |

|                                                              |         |        |        |        |        |        |
|--------------------------------------------------------------|---------|--------|--------|--------|--------|--------|
| Age                                                          | 0.0009  | 0.0003 | 1.0009 | 1.0003 | 1.0016 | 0.0051 |
| Obesity                                                      | -0.0618 | 0.0088 | 0.9401 | 0.9239 | 0.9565 | <.0001 |
| Hypertension                                                 | -0.0076 | 0.0068 | 0.9924 | 0.9793 | 1.0058 | 0.2654 |
| Hyperlipidemia                                               | 0.0537  | 0.0068 | 1.0552 | 1.0412 | 1.0693 | <.0001 |
| Amount of time the person was covered under the plan (years) | 1.5657  | 0.014  | 4.7862 | 4.6566 | 4.9195 | <.0001 |

HMO = health maintenance organization

IND = indemnity plan

PPO = preferred provider organization

EPO = exclusive provider organization

The fitted model coefficients reported here were used to predict odds (or probabilities) of the outcome for different groups of enrollees in different years. Various comparisons were then made between the estimated odds and these comparative odds were reported in the paper. While estimating these odds, all other predictors were assumed to be at their average value or reference value.



**Table 10: Logistic for other ocular imaging testing for those under the care of both provider types**

| Model Information           |          |
|-----------------------------|----------|
| Distribution                | Binomial |
| Link Function               | Logit    |
| Number of Observations Used | 467803   |
| Number of Events            | 92549    |
| Number of Trials            | 467803   |
| Missing Values              | 43       |

| Response Profile |                    |                 |
|------------------|--------------------|-----------------|
| Ordered Value    | Dependent variable | Total Frequency |
| 1                | 1                  | 92549           |
| 2                | 0                  | 375254          |

PROC GENMOD is modeling the probability that dependent variable='1'.

| Generalized Estimating Equations Model Information |                 |
|----------------------------------------------------|-----------------|
| Correlation Structure                              | 8-Dependent     |
| Within-Subject Effect                              | year (9 levels) |

| Generalized Estimating Equations Fit Criteria |             |
|-----------------------------------------------|-------------|
| Quasi-likelihood Information Criterion (QIC)  | 400492.5892 |

| Score Statistics For Type 3 Generalized Estimating Equations Analysis |                    |            |         |
|-----------------------------------------------------------------------|--------------------|------------|---------|
| Source                                                                | Degrees of Freedom | Chi-Square | p-value |
| Year                                                                  | 1                  | 276.62     | <.0001  |
| Year-squared                                                          | 1                  | 128.23     | <.0001  |
| Open-angle glaucoma                                                   | 1                  | 1557.6     | <.0001  |
| Year*Open-angle glaucoma                                              | 1                  | 51.08      | <.0001  |
| Year-squared*Open-angle glaucoma                                      | 1                  | 19.21      | <.0001  |
| Glaucoma suspect                                                      | 1                  | 1433.92    | <.0001  |
| Year*Glaucoma suspect                                                 | 1                  | 169.64     | <.0001  |
| Year-squared*Glaucoma suspect                                         | 1                  | 62.82      | <.0001  |
| Macular Edema                                                         | 1                  | 51.4       | <.0001  |
| Year*Macular Edema                                                    | 1                  | 39.41      | <.0001  |
| Year-squared*Macular Edema                                            | 1                  | 51.83      | <.0001  |

|                                                                     |   |         |        |
|---------------------------------------------------------------------|---|---------|--------|
| <b>Exudative Macular degeneration</b>                               | 1 | 0.14    | 0.7076 |
| <b>Year*Exudative Macular degeneration</b>                          | 1 | 33.99   | <.0001 |
| <b>Year-squared*Exudative Macular degeneration</b>                  | 1 | 4.55    | 0.0329 |
| <b>Other retina conditions</b>                                      | 1 | 27.1    | <.0001 |
| <b>Year*Other retinal conditions</b>                                | 1 | 6.19    | 0.0128 |
| <b>Year-squared*Other retinal conditions</b>                        | 1 | 0       | 0.9594 |
| <b>Other nerve conditions</b>                                       | 1 | 65.54   | <.0001 |
| <b>Year*Other nerve conditions</b>                                  | 1 | 20.84   | <.0001 |
| <b>Year-squared*Other nerve conditions</b>                          | 1 | 9.04    | 0.0026 |
| <b>Non-Proliferative Diabetic Retinopathy</b>                       | 1 | 239.22  | <.0001 |
| <b>Proliferative Diabetic Retinopathy</b>                           | 1 | 101.52  | <.0001 |
| <b>Race</b>                                                         | 4 | 3.06    | 0.5481 |
| <b>Insurance type</b>                                               | 2 | 123.14  | <.0001 |
| <b>Sex</b>                                                          | 1 | 0.52    | 0.4692 |
| <b>Education</b>                                                    | 4 | 8.79    | 0.0667 |
| <b>Household Net Worth</b>                                          | 4 | 31      | <.0001 |
| <b>US Region of residence</b>                                       | 4 | 474.01  | <.0001 |
| <b>Insurance plan</b>                                               | 5 | 212.19  | <.0001 |
| <b>Age</b>                                                          | 1 | 1.41    | 0.2354 |
| <b>Obesity</b>                                                      | 1 | 22.82   | <.0001 |
| <b>Hypertension</b>                                                 | 1 | 4.23    | 0.0397 |
| <b>Hyperlipidemia</b>                                               | 1 | 1.87    | 0.1715 |
| <b>Amount of time the person was covered under the plan (years)</b> | 1 | 3242.76 | <.0001 |

| <b>Parameter estimates</b>       |                 |                              |                               |                                                              |                                                              |                |
|----------------------------------|-----------------|------------------------------|-------------------------------|--------------------------------------------------------------|--------------------------------------------------------------|----------------|
| <b>Parameter</b>                 | <b>Estimate</b> | <b>Std error of estimate</b> | <b>Exponentiated estimate</b> | <b>95% lower confidence limit for exponentiated estimate</b> | <b>95% upper confidence limit for exponentiated estimate</b> | <b>p-value</b> |
| Intercept                        | -5.5198         | 0.0893                       | 0.004                         | 0.0034                                                       | 0.0048                                                       | <.0001         |
| Year                             | 0.4314          | 0.0252                       | 1.5395                        | 1.4652                                                       | 1.6175                                                       | <.0001         |
| Year-squared                     | -0.0288         | 0.0025                       | 0.9716                        | 0.9669                                                       | 0.9763                                                       | <.0001         |
| Open-angle glaucoma              | 2.7201          | 0.0634                       | 15.1812                       | 13.4064                                                      | 17.1911                                                      | <.0001         |
| Year*Open-angle glaucoma         | -0.1926         | 0.0257                       | 0.8248                        | 0.7843                                                       | 0.8675                                                       | <.0001         |
| Year-squared*Open-angle glaucoma | 0.0116          | 0.0025                       | 1.0116                        | 1.0066                                                       | 1.0166                                                       | <.0001         |
| Glaucoma suspect                 | 2.6015          | 0.0636                       | 13.4834                       | 11.9037                                                      | 15.2729                                                      | <.0001         |
| Year*Glaucoma suspect            | -0.3483         | 0.0257                       | 0.7059                        | 0.6712                                                       | 0.7424                                                       | <.0001         |
| Year-squared*Glaucoma suspect    | 0.0207          | 0.0025                       | 1.0209                        | 1.0159                                                       | 1.0259                                                       | <.0001         |
| Macular Edema                    | 0.9995          | 0.1163                       | 2.7169                        | 2.1629                                                       | 3.4127                                                       | <.0001         |
| Year*Macular Edema               | 0.301           | 0.0449                       | 1.3512                        | 1.2374                                                       | 1.4755                                                       | <.0001         |
| Year-squared*Macular Edema       | -0.0318         | 0.0042                       | 0.9687                        | 0.9608                                                       | 0.9767                                                       | <.0001         |

|                                                            |         |        |        |        |        |        |
|------------------------------------------------------------|---------|--------|--------|--------|--------|--------|
| Exudative Macular degeneration                             | 0.0512  | 0.1236 | 1.0526 | 0.8261 | 1.3412 | 0.6785 |
| Year*Exudative Macular degeneration                        | 0.2896  | 0.0493 | 1.3359 | 1.2128 | 1.4714 | <.0001 |
| Year-squared*Exudative Macular degeneration                | -0.0103 | 0.0047 | 0.9897 | 0.9807 | 0.9989 | 0.0278 |
| Other retina conditions                                    | -0.2744 | 0.0512 | 0.7601 | 0.6875 | 0.8403 | <.0001 |
| Year*Other retinal conditions                              | 0.0542  | 0.0211 | 1.0557 | 1.0129 | 1.1003 | 0.0103 |
| Year-squared*Other retinal conditions                      | 0.0001  | 0.0021 | 1.0001 | 0.996  | 1.0042 | 0.9581 |
| Other nerve conditions                                     | 0.3641  | 0.0421 | 1.4392 | 1.3252 | 1.563  | <.0001 |
| Year*Other nerve conditions                                | -0.0848 | 0.0179 | 0.9187 | 0.8871 | 0.9515 | <.0001 |
| Year-squared*Other nerve conditions                        | 0.0056  | 0.0018 | 1.0056 | 1.002  | 1.0091 | 0.002  |
| Non-Proliferative Diabetic Retinopathy                     | 0.3579  | 0.0218 | 1.4304 | 1.3705 | 1.4928 | <.0001 |
| Proliferative Diabetic Retinopathy                         | 0.3783  | 0.0359 | 1.4598 | 1.3605 | 1.5664 | <.0001 |
| Race: Blacks (vs Whites)                                   | -0.0112 | 0.0216 | 0.9889 | 0.9478 | 1.0317 | 0.6054 |
| Race: Latinos (vs Whites)                                  | 0.008   | 0.0242 | 1.008  | 0.9613 | 1.057  | 0.7418 |
| Race: Asians (vs Whites)                                   | -0.0521 | 0.0345 | 0.9493 | 0.8871 | 1.0157 | 0.1317 |
| Race: Other races (vs Whites)                              | -0.0331 | 0.0538 | 0.9675 | 0.8706 | 1.0751 | 0.5389 |
| Insurance type: Commercial & Medicaid (vs Commercial only) | -0.3117 | 0.0538 | 0.7322 | 0.6589 | 0.8136 | <.0001 |
| Insurance type: Commercial & Medicare (vs Commercial only) | -0.2896 | 0.0286 | 0.7485 | 0.7077 | 0.7917 | <.0001 |
| Sex: Females (vs Males)                                    | 0.0075  | 0.0104 | 1.0076 | 0.9873 | 1.0283 | 0.467  |
| Education: High school diploma (vs less than High School)  | -0.0346 | 0.0445 | 0.9659 | 0.8853 | 1.054  | 0.4362 |
| Education: Some college (vs less than High School)         | -0.0291 | 0.0451 | 0.9713 | 0.8892 | 1.061  | 0.5178 |
| Education: College diploma (vs less than High School)      | -0.0684 | 0.0464 | 0.9339 | 0.8526 | 1.0228 | 0.1406 |
| Education: Advanced degree (vs less than High School)      | 0.0741  | 0.1336 | 1.0769 | 0.8288 | 1.3993 | 0.5793 |
| Household Net Worth: 25K-75K (vs <25K)                     | 0.0935  | 0.0265 | 1.098  | 1.0425 | 1.1566 | 0.0004 |
| Household Net Worth: 75K-150K (vs <25K)                    | 0.0245  | 0.0231 | 1.0248 | 0.9795 | 1.0723 | 0.288  |
| Household Net Worth: 150K-500K (vs <25K)                   | 0.0796  | 0.0204 | 1.0829 | 1.0405 | 1.127  | <.0001 |
| Household Net Worth: >500K (vs <25K)                       | 0.1044  | 0.0237 | 1.1101 | 1.0598 | 1.1627 | <.0001 |
| US Region of residence: South-East (vs North-East)         | 0.0987  | 0.0153 | 1.1038 | 1.0711 | 1.1374 | <.0001 |
| US Region of residence: Mid-West (vs North-East)           | -0.1691 | 0.016  | 0.8445 | 0.8184 | 0.8713 | <.0001 |
| US Region of residence: West (vs North-East)               | 0.0524  | 0.0208 | 1.0538 | 1.0117 | 1.0977 | 0.0118 |
| US Region of residence: Other regions (vs North-East)      | 0.2809  | 0.1869 | 1.3243 | 0.9181 | 1.9102 | 0.1329 |
| Insurance Plan: PPO (vs HMO)                               | 0.1902  | 0.0196 | 1.2095 | 1.1638 | 1.2569 | <.0001 |
| Insurance Plan: EPO (vs HMO)                               | 0.1271  | 0.0207 | 1.1355 | 1.0903 | 1.1827 | <.0001 |
| Insurance Plan: POS (vs HMO)                               | 0.1748  | 0.0157 | 1.191  | 1.1548 | 1.2284 | <.0001 |
| Insurance Plan: IND (vs HMO)                               | 0.0439  | 0.024  | 1.0449 | 0.997  | 1.0952 | 0.0666 |
| Insurance Plan: Other plans (vs HMO)                       | -0.4323 | 0.0867 | 0.649  | 0.5476 | 0.7693 | <.0001 |
| Age                                                        | 0.0007  | 0.0006 | 1.0007 | 0.9995 | 1.0019 | 0.2325 |
| Obesity                                                    | -0.072  | 0.0151 | 0.9306 | 0.9034 | 0.9586 | <.0001 |

|                                                              |         |        |        |        |        |        |
|--------------------------------------------------------------|---------|--------|--------|--------|--------|--------|
| Hypertension                                                 | -0.0257 | 0.0124 | 0.9746 | 0.9511 | 0.9986 | 0.0386 |
| Hyperlipidemia                                               | 0.0171  | 0.0124 | 1.0172 | 0.9927 | 1.0423 | 0.17   |
| Amount of time the person was covered under the plan (years) | 1.4754  | 0.0294 | 4.373  | 4.1279 | 4.6327 | <.0001 |

HMO = health maintenance organization

IND = indemnity plan

PPO = preferred provider organization

EPO = exclusive provider organization

The fitted model coefficients reported here were used to predict odds (or probabilities) of the outcome for different groups of enrollees in different years. Various comparisons were then made between the estimated odds and these comparative odds were reported in the paper. While estimating these odds, all other predictors were assumed to be at their average value or reference value.

**Table 11: Logistic for other ocular imaging testing, including all provider types**

| Model Information           |          |
|-----------------------------|----------|
| Distribution                | Binomial |
| Link Function               | Logit    |
| Number of Observations Used | 2364531  |
| Number of Events            | 439290   |
| Number of Trials            | 2364531  |
| Missing Values              | 236      |

| Response Profile |                    |                 |
|------------------|--------------------|-----------------|
| Ordered Value    | Dependent variable | Total Frequency |
| 1                | 1                  | 439290          |
| 2                | 0                  | 1925241         |

PROC GENMOD is modeling the probability that dependent variable='1'.

| Generalized Estimating Equations Model Information |                 |
|----------------------------------------------------|-----------------|
| Correlation Structure                              | 8-Dependent     |
| Within-Subject Effect                              | year (9 levels) |

| Generalized Estimating Equations Fit Criteria |            |
|-----------------------------------------------|------------|
| Quasi-likelihood Information Criterion (QIC)  | 1961894.52 |

| Score Statistics For Type 3 Generalized Estimating Equations Analysis |                    |            |         |
|-----------------------------------------------------------------------|--------------------|------------|---------|
| Source                                                                | Degrees of Freedom | Chi-Square | p-value |
| Year                                                                  | 1                  | 1132.79    | <.0001  |
| Year-squared                                                          | 1                  | 536.94     | <.0001  |
| Open-angle glaucoma                                                   | 1                  | 7388.14    | <.0001  |
| Year*Open-angle glaucoma                                              | 1                  | 211.08     | <.0001  |
| Year-squared*Open-angle glaucoma                                      | 1                  | 96.69      | <.0001  |
| Glaucoma suspect                                                      | 1                  | 6534.63    | <.0001  |
| Year*Glaucoma suspect                                                 | 1                  | 462.06     | <.0001  |
| Year-squared*Glaucoma suspect                                         | 1                  | 141.65     | <.0001  |
| Macular Edema                                                         | 1                  | 189.03     | <.0001  |
| Year*Macular Edema                                                    | 1                  | 162.78     | <.0001  |
| Year-squared*Macular Edema                                            | 1                  | 182.9      | <.0001  |

|                                                                     |   |         |        |
|---------------------------------------------------------------------|---|---------|--------|
| <b>Exudative Macular degeneration</b>                               | 1 | 0.65    | 0.4211 |
| <b>Year*Exudative Macular degeneration</b>                          | 1 | 153.44  | <.0001 |
| <b>Year-squared*Exudative Macular degeneration</b>                  | 1 | 27.1    | <.0001 |
| <b>Other retina conditions</b>                                      | 1 | 140.38  | <.0001 |
| <b>Year*Other retinal conditions</b>                                | 1 | 17.28   | <.0001 |
| <b>Year-squared*Other retinal conditions</b>                        | 1 | 0.3     | 0.5863 |
| <b>Other nerve conditions</b>                                       | 1 | 454.39  | <.0001 |
| <b>Year*Other nerve conditions</b>                                  | 1 | 148.95  | <.0001 |
| <b>Year-squared*Other nerve conditions</b>                          | 1 | 83.58   | <.0001 |
| <b>Non-Proliferative Diabetic Retinopathy</b>                       | 1 | 949     | <.0001 |
| <b>Proliferative Diabetic Retinopathy</b>                           | 1 | 335.83  | <.0001 |
| <b>Race</b>                                                         | 4 | 15.29   | 0.0041 |
| <b>Insurance type</b>                                               | 2 | 311.71  | <.0001 |
| <b>Sex: Females (vs Males)</b>                                      | 1 | 33.7    | <.0001 |
| <b>Education</b>                                                    | 4 | 144     | <.0001 |
| <b>Household Net Worth</b>                                          | 4 | 193.5   | <.0001 |
| <b>US Region of residence</b>                                       | 4 | 1245.5  | <.0001 |
| <b>Insurance plan</b>                                               | 5 | 399.51  | <.0001 |
| <b>Age</b>                                                          | 1 | 11.6    | 0.0007 |
| <b>Obesity</b>                                                      | 1 | 95.67   | <.0001 |
| <b>Hypertension</b>                                                 | 1 | 6.73    | 0.0095 |
| <b>Hyperlipidemia</b>                                               | 1 | 67.52   | <.0001 |
| <b>Amount of time the person was covered under the plan (years)</b> | 1 | 21560   | <.0001 |
| <b>Eye-care</b>                                                     | 3 | 1913.73 | <.0001 |

**Parameter estimates**

| <b>Parameter</b>                 | <b>Estimate</b> | <b>Std error of estimate</b> | <b>Exponentiated estimate</b> | <b>95% lower confidence limit for exponentiated estimate</b> | <b>95% upper confidence limit for exponentiated estimate</b> | <b>p-value</b> |
|----------------------------------|-----------------|------------------------------|-------------------------------|--------------------------------------------------------------|--------------------------------------------------------------|----------------|
| Intercept                        | -5.7141         | 0.0409                       | 0.0033                        | 0.003                                                        | 0.0036                                                       | <.0001         |
| Year                             | 0.4235          | 0.0123                       | 1.5274                        | 1.4909                                                       | 1.5647                                                       | <.0001         |
| Year-squared                     | -0.0288         | 0.0012                       | 0.9716                        | 0.9693                                                       | 0.9739                                                       | <.0001         |
| Open-angle glaucoma              | 2.7577          | 0.0305                       | 15.764                        | 14.8481                                                      | 16.7365                                                      | <.0001         |
| Year*Open-angle glaucoma         | -0.1896         | 0.0125                       | 0.8273                        | 0.8072                                                       | 0.8478                                                       | <.0001         |
| Year-squared*Open-angle glaucoma | 0.0126          | 0.0012                       | 1.0127                        | 1.0103                                                       | 1.0152                                                       | <.0001         |
| Glaucoma suspect                 | 2.5903          | 0.0304                       | 13.3342                       | 12.5626                                                      | 14.1533                                                      | <.0001         |
| Year*Glaucoma suspect            | -0.2777         | 0.0124                       | 0.7575                        | 0.7392                                                       | 0.7762                                                       | <.0001         |
| Year-squared*Glaucoma suspect    | 0.0151          | 0.0012                       | 1.0152                        | 1.0128                                                       | 1.0177                                                       | <.0001         |
| Macular Edema                    | 0.9761          | 0.058                        | 2.654                         | 2.3686                                                       | 2.9737                                                       | <.0001         |
| Year*Macular Edema               | 0.3091          | 0.0231                       | 1.3622                        | 1.3019                                                       | 1.4254                                                       | <.0001         |
| Year-squared*Macular Edema       | -0.0309         | 0.0022                       | 0.9696                        | 0.9654                                                       | 0.9738                                                       | <.0001         |

|                                                            |         |        |        |        |        |        |
|------------------------------------------------------------|---------|--------|--------|--------|--------|--------|
| Exudative Macular degeneration                             | -0.0598 | 0.0679 | 0.9419 | 0.8245 | 1.076  | 0.3781 |
| Year*Exudative Macular degeneration                        | 0.3406  | 0.0275 | 1.4058 | 1.3319 | 1.4838 | <.0001 |
| Year-squared*Exudative Macular degeneration                | -0.0141 | 0.0026 | 0.986  | 0.9809 | 0.9911 | <.0001 |
| Other retina conditions                                    | -0.2919 | 0.0241 | 0.7469 | 0.7125 | 0.7829 | <.0001 |
| Year*Other retinal conditions                              | 0.0429  | 0.01   | 1.0439 | 1.0235 | 1.0646 | <.0001 |
| Year-squared*Other retinal conditions                      | 0.0006  | 0.001  | 1.0006 | 0.9986 | 1.0025 | 0.5762 |
| Other nerve conditions                                     | 0.44    | 0.0191 | 1.5528 | 1.4958 | 1.6119 | <.0001 |
| Year*Other nerve conditions                                | -0.1053 | 0.0083 | 0.9001 | 0.8856 | 0.9148 | <.0001 |
| Year-squared*Other nerve conditions                        | 0.0079  | 0.0008 | 1.008  | 1.0063 | 1.0096 | <.0001 |
| Non-Proliferative Diabetic Retinopathy                     | 0.3472  | 0.0106 | 1.4151 | 1.3859 | 1.4448 | <.0001 |
| Proliferative Diabetic Retinopathy                         | 0.3523  | 0.0183 | 1.4223 | 1.3721 | 1.4744 | <.0001 |
| Race: Blacks (vs Whites)                                   | -0.0138 | 0.0092 | 0.9863 | 0.9686 | 1.0043 | 0.1359 |
| Race: Latinos (vs Whites)                                  | 0.0312  | 0.0099 | 1.0317 | 1.012  | 1.0518 | 0.0015 |
| Race: Asians (vs Whites)                                   | 0.0162  | 0.0134 | 1.0163 | 0.99   | 1.0433 | 0.2257 |
| Race: Other races (vs Whites)                              | 0.0246  | 0.0237 | 1.0249 | 0.9784 | 1.0736 | 0.2997 |
| Insurance type: Commercial & Medicaid (vs Commercial only) | -0.3038 | 0.0263 | 0.738  | 0.7009 | 0.7771 | <.0001 |
| Insurance type: Commercial & Medicare (vs Commercial only) | -0.1881 | 0.013  | 0.8286 | 0.8077 | 0.85   | <.0001 |
| Sex: Females (vs Males)                                    | 0.0271  | 0.0047 | 1.0275 | 1.0182 | 1.0369 | <.0001 |
| Education: High school diploma (vs less than High School)  | 0.0233  | 0.0191 | 1.0236 | 0.986  | 1.0626 | 0.2224 |
| Education: Some college (vs less than High School)         | 0.0194  | 0.0193 | 1.0196 | 0.9817 | 1.059  | 0.3153 |
| Education: College diploma (vs less than High School)      | -0.0479 | 0.0199 | 0.9533 | 0.9168 | 0.9912 | 0.0162 |
| Education: Advanced degree (vs less than High School)      | -0.2017 | 0.047  | 0.8173 | 0.7454 | 0.8962 | <.0001 |
| Household Net Worth: 25K-75K (vs <25K)                     | 0.0323  | 0.0123 | 1.0328 | 1.0083 | 1.058  | 0.0084 |
| Household Net Worth: 75K-150K (vs <25K)                    | 0.0596  | 0.0106 | 1.0614 | 1.0396 | 1.0837 | <.0001 |
| Household Net Worth: 150K-500K (vs <25K)                   | 0.0948  | 0.0093 | 1.0995 | 1.0795 | 1.1198 | <.0001 |
| Household Net Worth: >500K (vs <25K)                       | 0.1345  | 0.0107 | 1.1439 | 1.1203 | 1.1681 | <.0001 |
| US Region of residence: South-East (vs North-East)         | 0.0625  | 0.0066 | 1.0645 | 1.0508 | 1.0784 | <.0001 |
| US Region of residence: Mid-West (vs North-East)           | -0.1386 | 0.0072 | 0.8706 | 0.8584 | 0.8829 | <.0001 |
| US Region of residence: West (vs North-East)               | 0.0483  | 0.0086 | 1.0494 | 1.0319 | 1.0672 | <.0001 |
| US Region of residence: Other regions (vs North-East)      | -0.0078 | 0.087  | 0.9923 | 0.8367 | 1.1767 | 0.9288 |
| Insurance Plan: PPO (vs HMO)                               | 0.0625  | 0.0088 | 1.0645 | 1.0464 | 1.083  | <.0001 |
| Insurance Plan: EPO (vs HMO)                               | 0.0838  | 0.0096 | 1.0874 | 1.0672 | 1.108  | <.0001 |
| Insurance Plan: POS (vs HMO)                               | 0.0903  | 0.0073 | 1.0945 | 1.0789 | 1.1103 | <.0001 |
| Insurance Plan: IND (vs HMO)                               | -0.0485 | 0.0114 | 0.9527 | 0.9317 | 0.9741 | <.0001 |
| Insurance Plan: Other plans (vs HMO)                       | -0.352  | 0.0407 | 0.7033 | 0.6493 | 0.7617 | <.0001 |
| Age                                                        | 0.001   | 0.0003 | 1.001  | 1.0004 | 1.0015 | 0.0006 |
| Obesity                                                    | -0.0692 | 0.0071 | 0.9331 | 0.9202 | 0.9462 | <.0001 |

|                                                                               |         |        |        |        |        |        |
|-------------------------------------------------------------------------------|---------|--------|--------|--------|--------|--------|
| Hypertension                                                                  | -0.0144 | 0.0055 | 0.9857 | 0.9751 | 0.9964 | 0.0092 |
| Hyperlipidemia                                                                | 0.0453  | 0.0055 | 1.0463 | 1.0351 | 1.0577 | <.0001 |
| Amount of time the person was covered under the plan (years)                  | 1.5172  | 0.0117 | 4.5595 | 4.456  | 4.6654 | <.0001 |
| Eye-care: Visited unspecified eye provider (vs visited ophthalmologists only) | -0.8511 | 0.0411 | 0.427  | 0.3939 | 0.4628 | <.0001 |
| Eye-care: Visited optometrists only (vs visited ophthalmologists only)        | -0.2215 | 0.0069 | 0.8014 | 0.7906 | 0.8123 | <.0001 |
| Eye-care: Visited both (vs visited ophthalmologists only)                     | 0.0598  | 0.0059 | 1.0616 | 1.0494 | 1.074  | <.0001 |

HMO = health maintenance organization  
IND = indemnity plan  
PPO = preferred provider organization  
EPO = exclusive provider organization

The fitted model coefficients reported here were used to predict odds (or probabilities) of the outcome for different groups of enrollees in different years. Various comparisons were then made between the estimated odds and these comparative odds were reported in the paper. While estimating these odds, all other predictors were assumed to be at their average value or reference value.



**Table 12: Logistic for other ocular imaging testing including all provider types, but only in open-angle glaucoma patients**

| Model Information           |          |
|-----------------------------|----------|
| Distribution                | Binomial |
| Link Function               | Logit    |
| Number of Observations Used | 463782   |
| Number of Events            | 167311   |
| Number of Trials            | 463782   |

| Response Profile |                    |                 |
|------------------|--------------------|-----------------|
| Ordered Value    | Dependent variable | Total Frequency |
| 1                | 1                  | 167311          |
| 2                | 0                  | 296471          |

PROC GENMOD is modeling the probability that dependent variable='1'.

| Generalized Estimating Equations Model Information |                 |
|----------------------------------------------------|-----------------|
| Correlation Structure                              | 8-Dependent     |
| Within-Subject Effect                              | year (9 levels) |

| Generalized Estimating Equations Fit Criteria |             |
|-----------------------------------------------|-------------|
| Quasi-likelihood Information Criterion (QIC)  | 583622.6715 |

| Score Statistics For Type 3 Generalized Estimating Equations Analysis |                    |            |         |
|-----------------------------------------------------------------------|--------------------|------------|---------|
| Source                                                                | Degrees of Freedom | Chi-Square | p-value |
| Year                                                                  | 1                  | 1337.81    | <.0001  |
| Year-squared                                                          | 1                  | 509.26     | <.0001  |
| Macular Edema                                                         | 1                  | 1.49       | 0.2228  |
| Year*Macular Edema                                                    | 1                  | 13         | 0.0003  |
| Year-squared*Macular Edema                                            | 1                  | 9.18       | 0.0024  |
| Exudative Macular degeneration                                        | 1                  | 0.31       | 0.579   |
| Year*Exudative Macular degeneration                                   | 1                  | 1.03       | 0.3097  |
| Year-squared*Exudative Macular degeneration                           | 1                  | 1.06       | 0.3033  |
| Other retina conditions                                               | 1                  | 0.49       | 0.4847  |
| Year*Other retinal conditions                                         | 1                  | 0.59       | 0.4413  |
| Year-squared*Other retinal conditions                                 | 1                  | 0.07       | 0.7942  |

|                                                                     |   |         |        |
|---------------------------------------------------------------------|---|---------|--------|
| <b>Other nerve conditions</b>                                       | 1 | 21.78   | <.0001 |
| <b>Year*Other nerve conditions</b>                                  | 1 | 10.99   | 0.0009 |
| <b>Year-squared*Other nerve conditions</b>                          | 1 | 10.17   | 0.0014 |
| <b>Non-Proliferative Diabetic Retinopathy</b>                       | 1 | 23.61   | <.0001 |
| <b>Proliferative Diabetic Retinopathy</b>                           | 1 | 15.34   | <.0001 |
| <b>Race</b>                                                         | 4 | 21.06   | 0.0003 |
| <b>Insurance type</b>                                               | 2 | 113.54  | <.0001 |
| <b>Sex</b>                                                          | 1 | 56.53   | <.0001 |
| <b>Education</b>                                                    | 4 | 41.91   | <.0001 |
| <b>Household Net Worth</b>                                          | 4 | 170.01  | <.0001 |
| <b>US Region of residence</b>                                       | 4 | 165.21  | <.0001 |
| <b>Insurance plan</b>                                               | 5 | 160.34  | <.0001 |
| <b>Age</b>                                                          | 1 | 83.69   | <.0001 |
| <b>Obesity</b>                                                      | 1 | 31.23   | <.0001 |
| <b>Hypertension</b>                                                 | 1 | 20.31   | <.0001 |
| <b>Hyperlipidemia</b>                                               | 1 | 97.5    | <.0001 |
| <b>Amount of time the person was covered under the plan (years)</b> | 1 | 9503.81 | <.0001 |
| <b>Eye-care</b>                                                     | 3 | 302.3   | <.0001 |

| <b>Parameter estimates</b>                  |                 |                              |                               |                                                              |                                                              |                |
|---------------------------------------------|-----------------|------------------------------|-------------------------------|--------------------------------------------------------------|--------------------------------------------------------------|----------------|
| <b>Parameter</b>                            | <b>Estimate</b> | <b>Std error of estimate</b> | <b>Exponentiated estimate</b> | <b>95% lower confidence limit for exponentiated estimate</b> | <b>95% upper confidence limit for exponentiated estimate</b> | <b>p-value</b> |
| Intercept                                   | -2.9927         | 0.0505                       | 0.05015                       | 0.04543                                                      | 0.05537                                                      | <.0001         |
| Year                                        | 0.2385          | 0.0066                       | 1.26936                       | 1.25312                                                      | 1.28582                                                      | <.0001         |
| Year-squared                                | -0.0161         | 0.0007                       | 0.98399                       | 0.98261                                                      | 0.98536                                                      | <.0001         |
| Macular Edema                               | 0.1495          | 0.1134                       | 1.16129                       | 0.92979                                                      | 1.45042                                                      | 0.1874         |
| Year*Macular Edema                          | 0.1759          | 0.0482                       | 1.19236                       | 1.08481                                                      | 1.31057                                                      | 0.0003         |
| Year-squared*Macular Edema                  | -0.0147         | 0.0048                       | 0.9854                        | 0.9762                                                       | 0.9947                                                       | 0.0021         |
| Exudative Macular degeneration              | -0.0684         | 0.1185                       | 0.93389                       | 0.74034                                                      | 1.17803                                                      | 0.5638         |
| Year*Exudative Macular degeneration         | 0.0531          | 0.0509                       | 1.05456                       | 0.95443                                                      | 1.16519                                                      | 0.2966         |
| Year-squared*Exudative Macular degeneration | 0.0055          | 0.0051                       | 1.00549                       | 0.99544                                                      | 1.01563                                                      | 0.2854         |
| Other retina conditions                     | 0.0248          | 0.0347                       | 1.02513                       | 0.95782                                                      | 1.09717                                                      | 0.4738         |
| Year*Other retinal conditions               | 0.0119          | 0.0152                       | 1.01198                       | 0.98225                                                      | 1.04261                                                      | 0.4336         |
| Year-squared*Other retinal conditions       | 0.0004          | 0.0016                       | 1.00042                       | 0.99734                                                      | 1.0035                                                       | 0.7913         |

|                                                                               |         |        |         |         |         |        |
|-------------------------------------------------------------------------------|---------|--------|---------|---------|---------|--------|
| Other nerve conditions                                                        | 0.1318  | 0.0275 | 1.14088 | 1.08112 | 1.20395 | <.0001 |
| Year*Other nerve conditions                                                   | -0.0416 | 0.0123 | 0.95924 | 0.93635 | 0.98268 | 0.0007 |
| Year-squared*Other nerve conditions                                           | 0.0042  | 0.0013 | 1.00417 | 1.00164 | 1.00671 | 0.0012 |
| Non-Proliferative Diabetic Retinopathy                                        | 0.0888  | 0.0181 | 1.0929  | 1.05476 | 1.13243 | <.0001 |
| Proliferative Diabetic Retinopathy                                            | -0.1176 | 0.0301 | 0.88905 | 0.83816 | 0.94304 | <.0001 |
| Race: Blacks (vs Whites)                                                      | -0.0484 | 0.0143 | 0.95274 | 0.92648 | 0.97975 | 0.0007 |
| Race: Latinos (vs Whites)                                                     | -0.0245 | 0.0182 | 0.97582 | 0.94157 | 1.01131 | 0.1793 |
| Race: Asians (vs Whites)                                                      | 0.0681  | 0.0251 | 1.07043 | 1.01905 | 1.12439 | 0.0067 |
| Race: Other races (vs Whites)                                                 | -0.0249 | 0.0437 | 0.97545 | 0.8954  | 1.06265 | 0.5694 |
| Insurance type: Commercial & Medicaid (vs Commercial only)                    | -0.4028 | 0.0438 | 0.66843 | 0.61339 | 0.7284  | <.0001 |
| Insurance type: Commercial & Medicare (vs Commercial only)                    | -0.1286 | 0.0199 | 0.87934 | 0.84576 | 0.91425 | <.0001 |
| Sex: Females (vs Males)                                                       | 0.0628  | 0.0083 | 1.06486 | 1.04758 | 1.08242 | <.0001 |
| Education: High school diploma (vs less than High School)                     | 0.0481  | 0.0312 | 1.04932 | 0.98713 | 1.11542 | 0.1225 |
| Education: Some college (vs less than High School)                            | 0.0773  | 0.0317 | 1.0804  | 1.01533 | 1.14965 | 0.0147 |
| Education: College diploma (vs less than High School)                         | 0.0208  | 0.033  | 1.02102 | 0.95701 | 1.0893  | 0.5289 |
| Education: Advanced degree (vs less than High School)                         | -0.2914 | 0.0965 | 0.74719 | 0.61845 | 0.90271 | 0.0025 |
| Household Net Worth: 25K-75K (vs <25K)                                        | 0.062   | 0.0214 | 1.064   | 1.02038 | 1.10949 | 0.0037 |
| Household Net Worth: 75K-150K (vs <25K)                                       | 0.0811  | 0.0185 | 1.08445 | 1.04579 | 1.12454 | <.0001 |
| Household Net Worth: 150K-500K (vs <25K)                                      | 0.1442  | 0.0162 | 1.15508 | 1.11894 | 1.19239 | <.0001 |
| Household Net Worth: >500K (vs <25K)                                          | 0.226   | 0.0188 | 1.25358 | 1.20814 | 1.30073 | <.0001 |
| US Region of residence: South-East (vs North-East)                            | -0.0467 | 0.0123 | 0.95435 | 0.9317  | 0.97756 | 0.0001 |
| US Region of residence: Mid-West (vs North-East)                              | -0.1554 | 0.0132 | 0.85604 | 0.83417 | 0.87848 | <.0001 |
| US Region of residence: West (vs North-East)                                  | -0.0754 | 0.0159 | 0.92741 | 0.89893 | 0.95679 | <.0001 |
| US Region of residence: Other regions (vs North-East)                         | -0.0542 | 0.1731 | 0.94722 | 0.67468 | 1.32985 | 0.7541 |
| Insurance Plan: PPO (vs HMO)                                                  | 0.0496  | 0.0157 | 1.05081 | 1.019   | 1.08362 | 0.0016 |
| Insurance Plan: EPO (vs HMO)                                                  | 0.1048  | 0.018  | 1.11049 | 1.07193 | 1.15045 | <.0001 |
| Insurance Plan: POS (vs HMO)                                                  | 0.0989  | 0.0137 | 1.10393 | 1.0747  | 1.13396 | <.0001 |
| Insurance Plan: IND (vs HMO)                                                  | -0.0353 | 0.0188 | 0.9653  | 0.93039 | 1.00153 | 0.0603 |
| Insurance Plan: Other plans (vs HMO)                                          | -0.368  | 0.0555 | 0.69209 | 0.62071 | 0.77168 | <.0001 |
| Age                                                                           | -0.0045 | 0.0005 | 0.99552 | 0.99456 | 0.99647 | <.0001 |
| Obesity                                                                       | -0.0724 | 0.013  | 0.93014 | 0.90678 | 0.95409 | <.0001 |
| Hypertension                                                                  | -0.0473 | 0.0105 | 0.95383 | 0.93449 | 0.97358 | <.0001 |
| Hyperlipidemia                                                                | 0.0999  | 0.0101 | 1.10501 | 1.08329 | 1.12715 | <.0001 |
| Amount of time the person was covered under the plan (years)                  | 1.9038  | 0.0209 | 6.71109 | 6.44189 | 6.99155 | <.0001 |
| Eye-care: Visited unspecified eye provider (vs visited ophthalmologists only) | -1.1529 | 0.0842 | 0.31573 | 0.26768 | 0.37242 | <.0001 |
| Eye-care: Visited optometrists only (vs visited ophthalmologists only)        | -0.074  | 0.0159 | 0.92863 | 0.90009 | 0.95808 | <.0001 |
| Eye-care: Visited both (vs visited                                            | 0.0811  | 0.0103 | 1.0845  | 1.06285 | 1.10659 | <.0001 |

| ophthalmologists only) | | | | | | |

HMO = health maintenance organization

IND = indemnity plan

PPO = preferred provider organization

EPO = exclusive provider organization

The fitted model coefficients reported here were used to predict odds (or probabilities) of the outcome for different groups of enrollees in different years. Various comparisons were then made between the estimated odds and these comparative odds were reported in the paper. While estimating these odds, all other predictors were assumed to be at their average value or reference value.

**Table 13: Logistic for fundus photography testing for those under the exclusive care of optometrists**

| Model Information           |          |
|-----------------------------|----------|
| Distribution                | Binomial |
| Link Function               | Logit    |
| Number of Observations Used | 338783   |
| Number of Events            | 60059    |
| Number of Trials            | 338783   |
| Missing Values              | 40       |

| Response Profile |                    |                 |
|------------------|--------------------|-----------------|
| Ordered Value    | Dependent variable | Total Frequency |
| 1                | 1                  | 60059           |
| 2                | 0                  | 278724          |

PROC GENMOD is modeling the probability that dependent variable='1'.

| Generalized Estimating Equations Model Information |                 |
|----------------------------------------------------|-----------------|
| Correlation Structure                              | 8-Dependent     |
| Within-Subject Effect                              | year (9 levels) |
| Generalized Estimating Equations Fit Criteria      |                 |
| Quasi-likelihood Information Criterion             | 307144.1228     |

| Score Statistics For Type 3 Generalized Estimating Equations Analysis |                    |            |         |
|-----------------------------------------------------------------------|--------------------|------------|---------|
| Source                                                                | Degrees of Freedom | Chi-Square | p-value |
| Year                                                                  | 1                  | 0.23       | 0.6316  |
| Year-squared                                                          | 1                  | 0.7        | 0.4033  |
| Open-angle glaucoma                                                   | 1                  | 9.74       | 0.0018  |
| Year*Open-angle glaucoma                                              | 1                  | 9.21       | 0.0024  |
| Year-squared*Open-angle glaucoma                                      | 1                  | 4.95       | 0.0261  |
| Glaucoma suspect                                                      | 1                  | 15.18      | <.0001  |
| Year*Glaucoma suspect                                                 | 1                  | 1.23       | 0.2683  |
| Year-squared*Glaucoma suspect                                         | 1                  | 1.48       | 0.2238  |
| Macular Edema                                                         | 1                  | 0.28       | 0.5996  |
| Year*Macular Edema                                                    | 1                  | 0          | 0.9804  |
| Year-squared*Macular Edema                                            | 1                  | 0.01       | 0.9422  |

|                                                                     |   |         |        |
|---------------------------------------------------------------------|---|---------|--------|
| <b>Exudative Macular degeneration</b>                               | 1 | 0.18    | 0.6741 |
| <b>Year*Exudative Macular degeneration</b>                          | 1 | 0.18    | 0.6722 |
| <b>Year-squared*Exudative Macular degeneration</b>                  | 1 | 0.08    | 0.7782 |
| <b>Other retina conditions</b>                                      | 1 | 40.27   | <.0001 |
| <b>Year*Other retinal conditions</b>                                | 1 | 28.97   | <.0001 |
| <b>Year-squared*Other retinal conditions</b>                        | 1 | 25.42   | <.0001 |
| <b>Other nerve conditions</b>                                       | 1 | 42.66   | <.0001 |
| <b>Year*Other nerve conditions</b>                                  | 1 | 26.6    | <.0001 |
| <b>Year-squared*Other nerve conditions</b>                          | 1 | 22.08   | <.0001 |
| <b>Non-Proliferative Diabetic Retinopathy</b>                       | 1 | 381.32  | <.0001 |
| <b>Proliferative Diabetic Retinopathy</b>                           | 1 | 0       | 0.9964 |
| <b>Race</b>                                                         | 4 | 18.09   | 0.0012 |
| <b>Insurance type</b>                                               | 2 | 14.05   | 0.0009 |
| <b>Sex</b>                                                          | 1 | 7.7     | 0.0055 |
| <b>Education</b>                                                    | 4 | 2.91    | 0.5723 |
| <b>Household Net Worth</b>                                          | 4 | 78.57   | <.0001 |
| <b>US Region of residence</b>                                       | 4 | 709.07  | <.0001 |
| <b>Insurance plan</b>                                               | 5 | 260.23  | <.0001 |
| <b>Age</b>                                                          | 1 | 129.44  | <.0001 |
| <b>Obesity</b>                                                      | 1 | 5.91    | 0.015  |
| <b>Hypertension</b>                                                 | 1 | 1.7     | 0.1924 |
| <b>Hyperlipidemia</b>                                               | 1 | 1.38    | 0.2406 |
| <b>Amount of time the person was covered under the plan (years)</b> | 1 | 2989.27 | <.0001 |

| <b>Parameter estimates</b>       |                 |                              |                               |                                                              |                                                              |                |
|----------------------------------|-----------------|------------------------------|-------------------------------|--------------------------------------------------------------|--------------------------------------------------------------|----------------|
| <b>Parameter</b>                 | <b>Estimate</b> | <b>Std error of estimate</b> | <b>Exponentiated estimate</b> | <b>95% lower confidence limit for exponentiated estimate</b> | <b>95% upper confidence limit for exponentiated estimate</b> | <b>p-value</b> |
| Intercept                        | -3.0597         | 0.1025                       | 0.0469                        | 0.03836                                                      | 0.05734                                                      | <.0001         |
| Year                             | 0.016           | 0.032                        | 1.01618                       | 0.95434                                                      | 1.08202                                                      | 0.6164         |
| Year-squared                     | -0.0027         | 0.0031                       | 0.99728                       | 0.99118                                                      | 1.00343                                                      | 0.3853         |
| Open-angle glaucoma              | 0.304           | 0.0919                       | 1.35531                       | 1.13193                                                      | 1.62278                                                      | 0.0009         |
| Year*Open-angle glaucoma         | 0.1193          | 0.0384                       | 1.12672                       | 1.04496                                                      | 1.21489                                                      | 0.0019         |
| Year-squared*Open-angle glaucoma | -0.0086         | 0.0038                       | 0.99139                       | 0.98403                                                      | 0.99881                                                      | 0.023          |
| Glaucoma suspect                 | 0.3235          | 0.0777                       | 1.38197                       | 1.18675                                                      | 1.6093                                                       | <.0001         |
| Year*Glaucoma suspect            | 0.037           | 0.0321                       | 1.03769                       | 0.97442                                                      | 1.10507                                                      | 0.2491         |
| Year-squared*Glaucoma suspect    | -0.0039         | 0.0031                       | 0.99607                       | 0.98998                                                      | 1.00219                                                      | 0.2079         |
| Macular Edema                    | 0.2059          | 0.3385                       | 1.22868                       | 0.63282                                                      | 2.38558                                                      | 0.543          |
| Year*Macular Edema               | 0.0037          | 0.1404                       | 1.00375                       | 0.76226                                                      | 1.32174                                                      | 0.9787         |

|                                                            |         |        |         |         |         |        |
|------------------------------------------------------------|---------|--------|---------|---------|---------|--------|
| Year-squared*Macular Edema                                 | -0.0011 | 0.0136 | 0.99895 | 0.9727  | 1.0259  | 0.9381 |
| Exudative Macular degeneration                             | 0.1713  | 0.3584 | 1.1868  | 0.58786 | 2.39597 | 0.6328 |
| Year*Exudative Macular degeneration                        | 0.0665  | 0.1467 | 1.06879 | 0.80167 | 1.42491 | 0.6503 |
| Year-squared*Exudative Macular degeneration                | -0.0043 | 0.0144 | 0.99567 | 0.96794 | 1.0242  | 0.7634 |
| Other retina conditions                                    | 0.5165  | 0.0745 | 1.67619 | 1.44848 | 1.93969 | <.0001 |
| Year*Other retinal conditions                              | 0.1708  | 0.0306 | 1.18631 | 1.1173  | 1.25958 | <.0001 |
| Year-squared*Other retinal conditions                      | -0.0155 | 0.003  | 0.98463 | 0.97891 | 0.99038 | <.0001 |
| Other nerve conditions                                     | 0.4731  | 0.0647 | 1.60492 | 1.4138  | 1.82188 | <.0001 |
| Year*Other nerve conditions                                | -0.1482 | 0.0267 | 0.86222 | 0.81823 | 0.90857 | <.0001 |
| Year-squared*Other nerve conditions                        | 0.013   | 0.0026 | 1.01308 | 1.00788 | 1.01831 | <.0001 |
| Non-Proliferative Diabetic Retinopathy                     | 0.7485  | 0.0322 | 2.11384 | 1.98441 | 2.25171 | <.0001 |
| Proliferative Diabetic Retinopathy                         | 0.0006  | 0.1362 | 1.00062 | 0.76617 | 1.30682 | 0.9964 |
| Race: Blacks (vs Whites)                                   | -0.0577 | 0.0247 | 0.94395 | 0.8993  | 0.99082 | 0.0196 |
| Race: Latinos (vs Whites)                                  | 0.047   | 0.0269 | 1.04817 | 0.99442 | 1.10482 | 0.0798 |
| Race: Asians (vs Whites)                                   | 0.1212  | 0.0399 | 1.12885 | 1.04384 | 1.22078 | 0.0024 |
| Race: Other races (vs Whites)                              | -0.0216 | 0.0633 | 0.97861 | 0.86441 | 1.1079  | 0.7327 |
| Insurance type: Commercial & Medicaid (vs Commercial only) | -0.1777 | 0.0555 | 0.83723 | 0.75096 | 0.93341 | 0.0014 |
| Insurance type: Commercial & Medicare (vs Commercial only) | 0.0424  | 0.0335 | 1.04332 | 0.97695 | 1.11421 | 0.206  |
| Sex: Females (vs Males)                                    | 0.0309  | 0.0111 | 1.03136 | 1.00907 | 1.05413 | 0.0056 |
| Education: High school diploma (vs less than High School)  | -0.0466 | 0.049  | 0.9545  | 0.86706 | 1.05077 | 0.3422 |
| Education: Some college (vs less than High School)         | -0.0598 | 0.0497 | 0.94198 | 0.8545  | 1.03841 | 0.2294 |
| Education: College diploma (vs less than High School)      | -0.041  | 0.0513 | 0.95984 | 0.8681  | 1.06127 | 0.4239 |
| Education: Advanced degree (vs less than High School)      | -0.0793 | 0.1516 | 0.92379 | 0.68635 | 1.24337 | 0.601  |
| Household Net Worth: 25K-75K (vs <25K)                     | 0.0075  | 0.0276 | 1.00757 | 0.95452 | 1.06356 | 0.7847 |
| Household Net Worth: 75K-150K (vs <25K)                    | 0.0317  | 0.0237 | 1.03216 | 0.9854  | 1.08114 | 0.1809 |
| Household Net Worth: 150K-500K (vs <25K)                   | 0.1253  | 0.0212 | 1.13343 | 1.08723 | 1.1816  | <.0001 |
| Household Net Worth: >500K (vs <25K)                       | 0.1665  | 0.0257 | 1.1812  | 1.12318 | 1.24221 | <.0001 |
| US Region of residence: South-East (vs North-East)         | 0.0974  | 0.0155 | 1.10228 | 1.06936 | 1.13621 | <.0001 |
| US Region of residence: Mid-West (vs North-East)           | -0.2585 | 0.0163 | 0.77224 | 0.74791 | 0.79735 | <.0001 |
| US Region of residence: West (vs North-East)               | -0.115  | 0.0236 | 0.89139 | 0.85116 | 0.93353 | <.0001 |
| US Region of residence: Other regions (vs North-East)      | -0.2324 | 0.218  | 0.79265 | 0.51708 | 1.21509 | 0.2864 |
| Insurance Plan: PPO (vs HMO)                               | 0.1699  | 0.0202 | 1.18523 | 1.13922 | 1.23309 | <.0001 |
| Insurance Plan: EPO (vs HMO)                               | 0.1466  | 0.0219 | 1.15794 | 1.10932 | 1.20869 | <.0001 |
| Insurance Plan: POS (vs HMO)                               | 0.2389  | 0.016  | 1.26986 | 1.23073 | 1.31022 | <.0001 |
| Insurance Plan: IND (vs HMO)                               | 0.103   | 0.0345 | 1.10844 | 1.03597 | 1.18598 | 0.0028 |
| Insurance Plan: Other plans (vs HMO)                       | -0.2898 | 0.0988 | 0.74842 | 0.61667 | 0.90832 | 0.0034 |
| Age                                                        | -0.008  | 0.0007 | 0.99202 | 0.99064 | 0.99339 | <.0001 |

|                                                              |         |        |         |         |         |        |
|--------------------------------------------------------------|---------|--------|---------|---------|---------|--------|
| Obesity                                                      | -0.0413 | 0.0171 | 0.95955 | 0.92793 | 0.99225 | 0.0157 |
| Hypertension                                                 | 0.0166  | 0.0128 | 1.01678 | 0.99162 | 1.04258 | 0.193  |
| Hyperlipidemia                                               | 0.0147  | 0.0126 | 1.01483 | 0.99015 | 1.04012 | 0.2414 |
| Amount of time the person was covered under the plan (years) | 1.3173  | 0.0277 | 3.73323 | 3.53626 | 3.94117 | <.0001 |

HMO = health maintenance organization

IND = indemnity plan

PPO = preferred provider organization

EPO = exclusive provider organization

The fitted model coefficients reported here were used to predict odds (or probabilities) of the outcome for different groups of enrollees in different years. Various comparisons were then made between the estimated odds and these comparative odds were reported in the paper. While estimating these odds, all other predictors were assumed to be at their average value or reference value.



**Table 14: Logistic for fundus photography testing for those under the exclusive care of ophthalmologists**

| Model Information           |          |
|-----------------------------|----------|
| Distribution                | Binomial |
| Link Function               | Logit    |
| Number of Observations Used | 1546292  |
| Number of Events            | 168891   |
| Number of Trials            | 1546292  |
| Missing Values              | 153      |

| Response Profile |                    |                 |
|------------------|--------------------|-----------------|
| Ordered Value    | Dependent variable | Total Frequency |
| 1                | 1                  | 168891          |
| 2                | 0                  | 1377401         |

PROC GENMOD is modeling the probability that dependent variable='1'.

| Generalized Estimating Equations Model Information |                 |
|----------------------------------------------------|-----------------|
| Correlation Structure                              | 8-Dependent     |
| Within-Subject Effect                              | year (9 levels) |
| Generalized Estimating Equations Fit Criteria      |                 |
| Quasi-likelihood Information Criterion             | 1007817.635     |

| Score Statistics For Type 3 Generalized Estimating Equations Analysis |                    |            |         |
|-----------------------------------------------------------------------|--------------------|------------|---------|
| Source                                                                | Degrees of Freedom | Chi-Square | p-value |
| Year                                                                  | 1                  | 22.36      | <.0001  |
| Year-squared                                                          | 1                  | 18.5       | <.0001  |
| Open-angle glaucoma                                                   | 1                  | 330.76     | <.0001  |
| Year*Open-angle glaucoma                                              | 1                  | 5.91       | 0.015   |
| Year-squared*Open-angle glaucoma                                      | 1                  | 0          | 0.9602  |
| Glaucoma suspect                                                      | 1                  | 357.31     | <.0001  |
| Year*Glaucoma suspect                                                 | 1                  | 2.44       | 0.1184  |
| Year-squared*Glaucoma suspect                                         | 1                  | 1.96       | 0.1615  |
| Macular Edema                                                         | 1                  | 806.58     | <.0001  |
| Year*Macular Edema                                                    | 1                  | 88.31      | <.0001  |
| Year-squared*Macular Edema                                            | 1                  | 7.29       | 0.0069  |

|                                                                     |   |         |        |
|---------------------------------------------------------------------|---|---------|--------|
| <b>Exudative Macular degeneration</b>                               | 1 | 1120.54 | <.0001 |
| <b>Year*Exudative Macular degeneration</b>                          | 1 | 52.74   | <.0001 |
| <b>Year-squared*Exudative Macular degeneration</b>                  | 1 | 0.01    | 0.9209 |
| <b>Other retina conditions</b>                                      | 1 | 1129.87 | <.0001 |
| <b>Year*Other retinal conditions</b>                                | 1 | 47.05   | <.0001 |
| <b>Year-squared*Other retinal conditions</b>                        | 1 | 17.2    | <.0001 |
| <b>Other nerve conditions</b>                                       | 1 | 6.1     | 0.0135 |
| <b>Year*Other nerve conditions</b>                                  | 1 | 4.1     | 0.043  |
| <b>Year-squared*Other nerve conditions</b>                          | 1 | 4.73    | 0.0297 |
| <b>Non-Proliferative Diabetic Retinopathy</b>                       | 1 | 2758.58 | <.0001 |
| <b>Proliferative Diabetic Retinopathy</b>                           | 1 | 666.67  | <.0001 |
| <b>Race</b>                                                         | 4 | 158.63  | <.0001 |
| <b>Insurance type</b>                                               | 2 | 186.8   | <.0001 |
| <b>Sex</b>                                                          | 1 | 0.37    | 0.5424 |
| <b>Education</b>                                                    | 4 | 157.65  | <.0001 |
| <b>Household Net Worth</b>                                          | 4 | 17.62   | 0.0015 |
| <b>US Region of residence</b>                                       | 4 | 2670.46 | <.0001 |
| <b>Insurance plan</b>                                               | 5 | 299.36  | <.0001 |
| <b>Age</b>                                                          | 1 | 274.69  | <.0001 |
| <b>Obesity</b>                                                      | 1 | 1.55    | 0.2134 |
| <b>Hypertension</b>                                                 | 1 | 28.42   | <.0001 |
| <b>Hyperlipidemia</b>                                               | 1 | 13.23   | 0.0003 |
| <b>Amount of time the person was covered under the plan (years)</b> | 1 | 8149.86 | <.0001 |

| <b>Parameter estimates</b>       |                 |                              |                               |                                                              |                                                              |                |
|----------------------------------|-----------------|------------------------------|-------------------------------|--------------------------------------------------------------|--------------------------------------------------------------|----------------|
| <b>Parameter</b>                 | <b>Estimate</b> | <b>Std error of estimate</b> | <b>Exponentiated estimate</b> | <b>95% lower confidence limit for exponentiated estimate</b> | <b>95% upper confidence limit for exponentiated estimate</b> | <b>p-value</b> |
| Intercept                        | -3.5083         | 0.0465                       | 0.02995                       | 0.02734                                                      | 0.0328                                                       | <.0001         |
| Year                             | -0.0621         | 0.0127                       | 0.93978                       | 0.91675                                                      | 0.9634                                                       | <.0001         |
| Year-squared                     | 0.006           | 0.0013                       | 1.00598                       | 1.00333                                                      | 1.0086                                                       | <.0001         |
| Open-angle glaucoma              | 0.5471          | 0.0285                       | 1.72818                       | 1.63438                                                      | 1.8274                                                       | <.0001         |
| Year*Open-angle glaucoma         | 0.0333          | 0.0133                       | 1.03384                       | 1.00722                                                      | 1.0612                                                       | 0.0124         |
| Year-squared*Open-angle glaucoma | 0.0001          | 0.0014                       | 1.00007                       | 0.9973                                                       | 1.0029                                                       | 0.9593         |
| Glaucoma suspect                 | 0.5605          | 0.028                        | 1.75158                       | 1.65796                                                      | 1.8505                                                       | <.0001         |
| Year*Glaucoma suspect            | -0.0212         | 0.0131                       | 0.97899                       | 0.95409                                                      | 1.0045                                                       | 0.1061         |
| Year-squared*Glaucoma suspect    | 0.002           | 0.0014                       | 1.00201                       | 0.99928                                                      | 1.0047                                                       | 0.15           |
| Macular Edema                    | 1.9639          | 0.0509                       | 7.12706                       | 6.45033                                                      | 7.8748                                                       | <.0001         |

|                                                            |         |        |         |         |         |        |
|------------------------------------------------------------|---------|--------|---------|---------|---------|--------|
| Year*Macular Edema                                         | -0.2234 | 0.0229 | 0.79983 | 0.76466 | 0.8366  | <.0001 |
| Year-squared*Macular Edema                                 | 0.0065  | 0.0024 | 1.00647 | 1.00182 | 1.0111  | 0.0063 |
| Exudative Macular degeneration                             | 2.2875  | 0.0487 | 9.85041 | 8.95428 | 10.8362 | <.0001 |
| Year*Exudative Macular degeneration                        | -0.1659 | 0.0228 | 0.84715 | 0.81019 | 0.8858  | <.0001 |
| Year-squared*Exudative Macular degeneration                | -0.0002 | 0.0024 | 0.99976 | 0.99498 | 1.0046  | 0.9216 |
| Other retina conditions                                    | 0.9007  | 0.0246 | 2.46139 | 2.34546 | 2.583   | <.0001 |
| Year*Other retinal conditions                              | -0.0818 | 0.0115 | 0.92142 | 0.90079 | 0.9425  | <.0001 |
| Year-squared*Other retinal conditions                      | 0.0052  | 0.0012 | 1.00523 | 1.00282 | 1.0076  | <.0001 |
| Other nerve conditions                                     | 0.0622  | 0.0241 | 1.0642  | 1.01513 | 1.1157  | 0.0098 |
| Year*Other nerve conditions                                | -0.0236 | 0.0113 | 0.97663 | 0.95529 | 0.9984  | 0.0359 |
| Year-squared*Other nerve conditions                        | 0.0027  | 0.0012 | 1.00267 | 1.00033 | 1.005   | 0.0254 |
| Non-Proliferative Diabetic Retinopathy                     | 0.7674  | 0.0121 | 2.15419 | 2.10352 | 2.2061  | <.0001 |
| Proliferative Diabetic Retinopathy                         | 0.5187  | 0.0185 | 1.67977 | 1.61988 | 1.7419  | <.0001 |
| Race: Blacks (vs Whites)                                   | 0.1324  | 0.0126 | 1.14161 | 1.11376 | 1.1702  | <.0001 |
| Race: Latinos (vs Whites)                                  | 0.0687  | 0.013  | 1.07107 | 1.04403 | 1.0988  | <.0001 |
| Race: Asians (vs Whites)                                   | 0.1178  | 0.0174 | 1.12502 | 1.08726 | 1.1641  | <.0001 |
| Race: Other races (vs Whites)                              | 0.0834  | 0.0319 | 1.08702 | 1.02119 | 1.1571  | 0.0089 |
| Insurance type: Commercial & Medicaid (vs Commercial only) | -0.3677 | 0.0385 | 0.69233 | 0.642   | 0.7466  | <.0001 |
| Insurance type: Commercial & Medicare (vs Commercial only) | -0.1797 | 0.0172 | 0.83549 | 0.80781 | 0.8641  | <.0001 |
| Sex: Females (vs Males)                                    | -0.004  | 0.0065 | 0.99605 | 0.98345 | 1.0088  | 0.5427 |
| Education: High school diploma (vs less than High School)  | 0.0613  | 0.0254 | 1.06319 | 1.01163 | 1.1174  | 0.0157 |
| Education: Some college (vs less than High School)         | 0.0819  | 0.0257 | 1.08533 | 1.032   | 1.1414  | 0.0014 |
| Education: College diploma (vs less than High School)      | -0.0229 | 0.0266 | 0.97741 | 0.92784 | 1.0296  | 0.3895 |
| Education: Advanced degree (vs less than High School)      | -0.1492 | 0.0605 | 0.86137 | 0.76507 | 0.9698  | 0.0136 |
| Household Net Worth: 25K-75K (vs <25K)                     | -0.0451 | 0.017  | 0.95587 | 0.92454 | 0.9883  | 0.008  |
| Household Net Worth: 75K-150K (vs <25K)                    | -0.0376 | 0.0147 | 0.96311 | 0.93568 | 0.9913  | 0.0108 |
| Household Net Worth: 150K-500K (vs <25K)                   | -0.0303 | 0.0129 | 0.97019 | 0.94605 | 0.9949  | 0.0186 |
| Household Net Worth: >500K (vs <25K)                       | -0.0053 | 0.0146 | 0.99473 | 0.9666  | 1.0237  | 0.7181 |
| US Region of residence: South-East (vs North-East)         | 0.0076  | 0.0089 | 1.00766 | 0.99016 | 1.0255  | 0.3932 |
| US Region of residence: Mid-West (vs North-East)           | -0.3452 | 0.0102 | 0.70807 | 0.69402 | 0.7224  | <.0001 |
| US Region of residence: West (vs North-East)               | -0.3406 | 0.0121 | 0.71131 | 0.69466 | 0.7284  | <.0001 |
| US Region of residence: Other regions (vs North-East)      | -0.1011 | 0.1184 | 0.90384 | 0.71671 | 1.1398  | 0.3929 |
| Insurance Plan: PPO (vs HMO)                               | -0.0208 | 0.0125 | 0.97944 | 0.95582 | 1.0036  | 0.0952 |
| Insurance Plan: EPO (vs HMO)                               | 0.0608  | 0.0137 | 1.06274 | 1.0345  | 1.0917  | <.0001 |
| Insurance Plan: POS (vs HMO)                               | 0.0422  | 0.0107 | 1.04306 | 1.02145 | 1.0651  | <.0001 |
| Insurance Plan: IND (vs HMO)                               | -0.1308 | 0.0161 | 0.87742 | 0.85022 | 0.9055  | <.0001 |
| Insurance Plan: Other plans (vs HMO)                       | -0.5811 | 0.0603 | 0.55928 | 0.49698 | 0.6294  | <.0001 |

|                                                              |         |        |         |         |        |        |
|--------------------------------------------------------------|---------|--------|---------|---------|--------|--------|
| Age                                                          | -0.0063 | 0.0004 | 0.99374 | 0.993   | 0.9945 | <.0001 |
| Obesity                                                      | -0.0123 | 0.0099 | 0.98774 | 0.96869 | 1.0072 | 0.2147 |
| Hypertension                                                 | 0.0419  | 0.0079 | 1.04277 | 1.02677 | 1.059  | <.0001 |
| Hyperlipidemia                                               | 0.0283  | 0.0078 | 1.02872 | 1.01309 | 1.0446 | 0.0003 |
| Amount of time the person was covered under the plan (years) | 1.2586  | 0.0168 | 3.52054 | 3.40645 | 3.6384 | <.0001 |

HMO = health maintenance organization

IND = indemnity plan

PPO = preferred provider organization

EPO = exclusive provider organization

The fitted model coefficients reported here were used to predict odds (or probabilities) of the outcome for different groups of enrollees in different years. Various comparisons were then made between the estimated odds and these comparative odds were reported in the paper. While estimating these odds, all other predictors were assumed to be at their average value or reference value.

**Table 15: Logistic for fundus photography testing for those under the care of both provider types**

| Model Information           |          |
|-----------------------------|----------|
| Distribution                | Binomial |
| Link Function               | Logit    |
| Number of Observations Used | 467803   |
| Number of Events            | 73741    |
| Number of Trials            | 467803   |
| Missing Values              | 43       |

| Response Profile |                    |                 |
|------------------|--------------------|-----------------|
| Ordered Value    | Dependent variable | Total Frequency |
| 1                | 1                  | 73741           |
| 2                | 0                  | 394062          |

PROC GENMOD is modeling the probability that dependent variable='1'.

| Generalized Estimating Equations Model Information |                 |
|----------------------------------------------------|-----------------|
| Correlation Structure                              | 8-Dependent     |
| Within-Subject Effect                              | year (9 levels) |
| Generalized Estimating Equations Fit Criteria      |                 |
| Quasi-likelihood Information Criterion             | 386027.3452     |

| Score Statistics For Type 3 Generalized Estimating Equations Analysis |                    |            |         |
|-----------------------------------------------------------------------|--------------------|------------|---------|
| Source                                                                | Degrees of Freedom | Chi-Square | p-value |
| Year                                                                  | 1                  | 7.21       | 0.0073  |
| Year-squared                                                          | 1                  | 7.42       | 0.0065  |
| Open-angle glaucoma                                                   | 1                  | 13.91      | 0.0002  |
| Year*Open-angle glaucoma                                              | 1                  | 21.19      | <.0001  |
| Year-squared*Open-angle glaucoma                                      | 1                  | 8.37       | 0.0038  |
| Glaucoma suspect                                                      | 1                  | 36.37      | <.0001  |
| Year*Glaucoma suspect                                                 | 1                  | 0.01       | 0.9318  |
| Year-squared*Glaucoma suspect                                         | 1                  | 0.01       | 0.9036  |
| Macular Edema                                                         | 1                  | 348.74     | <.0001  |
| Year*Macular Edema                                                    | 1                  | 69.43      | <.0001  |
| Year-squared*Macular Edema                                            | 1                  | 13.92      | 0.0002  |
| Exudative Macular degeneration                                        | 1                  | 498.65     | <.0001  |

|                                                                     |   |         |        |
|---------------------------------------------------------------------|---|---------|--------|
| <b>Year*Exudative Macular degeneration</b>                          | 1 | 47.56   | <.0001 |
| <b>Year-squared*Exudative Macular degeneration</b>                  | 1 | 4.1     | 0.0429 |
| <b>Other retina conditions</b>                                      | 1 | 340.96  | <.0001 |
| <b>Year*Other retinal conditions</b>                                | 1 | 0.07    | 0.7972 |
| <b>Year-squared*Other retinal conditions</b>                        | 1 | 1.39    | 0.2384 |
| <b>Other nerve conditions</b>                                       | 1 | 3.98    | 0.046  |
| <b>Year*Other nerve conditions</b>                                  | 1 | 2.67    | 0.102  |
| <b>Year-squared*Other nerve conditions</b>                          | 1 | 2.07    | 0.1499 |
| <b>Non-Proliferative Diabetic Retinopathy</b>                       | 1 | 982.47  | <.0001 |
| <b>Proliferative Diabetic Retinopathy</b>                           | 1 | 200.74  | <.0001 |
| <b>Race</b>                                                         | 4 | 4.44    | 0.3499 |
| <b>Insurance type</b>                                               | 2 | 34.22   | <.0001 |
| <b>Sex</b>                                                          | 1 | 0.03    | 0.8641 |
| <b>Education</b>                                                    | 4 | 60.64   | <.0001 |
| <b>Household Net Worth</b>                                          | 4 | 27.38   | <.0001 |
| <b>US Region of residence</b>                                       | 4 | 898.68  | <.0001 |
| <b>Insurance plan</b>                                               | 5 | 156.85  | <.0001 |
| <b>Age</b>                                                          | 1 | 156.43  | <.0001 |
| <b>Obesity</b>                                                      | 1 | 12.02   | 0.0005 |
| <b>Hypertension</b>                                                 | 1 | 13.46   | 0.0002 |
| <b>Hyperlipidemia</b>                                               | 1 | 0.09    | 0.7647 |
| <b>Amount of time the person was covered under the plan (years)</b> | 1 | 2181.11 | <.0001 |

| <b>Parameter estimates</b>       |                 |                              |                               |                                                              |                                                              |                |
|----------------------------------|-----------------|------------------------------|-------------------------------|--------------------------------------------------------------|--------------------------------------------------------------|----------------|
| <b>Parameter</b>                 | <b>Estimate</b> | <b>Std error of estimate</b> | <b>Exponentiated estimate</b> | <b>95% lower confidence limit for exponentiated estimate</b> | <b>95% upper confidence limit for exponentiated estimate</b> | <b>p-value</b> |
| Intercept                        | -2.9936         | 0.0787                       | 0.0501                        | 0.04294                                                      | 0.05846                                                      | <.0001         |
| Year                             | -0.0571         | 0.0206                       | 0.94447                       | 0.90714                                                      | 0.98334                                                      | 0.0055         |
| Year-squared                     | 0.006           | 0.0021                       | 1.00602                       | 1.0018                                                       | 1.01025                                                      | 0.0051         |
| Open-angle glaucoma              | 0.1876          | 0.0487                       | 1.2064                        | 1.09663                                                      | 1.32715                                                      | 0.0001         |
| Year*Open-angle glaucoma         | 0.1028          | 0.0218                       | 1.10832                       | 1.06189                                                      | 1.15677                                                      | <.0001         |
| Year-squared*Open-angle glaucoma | -0.0067         | 0.0023                       | 0.99332                       | 0.98892                                                      | 0.99775                                                      | 0.0032         |
| Glaucoma suspect                 | 0.3051          | 0.0485                       | 1.35679                       | 1.23371                                                      | 1.49215                                                      | <.0001         |
| Year*Glaucoma suspect            | -0.0019         | 0.0218                       | 0.99808                       | 0.95643                                                      | 1.04155                                                      | 0.9297         |
| Year-squared*Glaucoma suspect    | 0.0003          | 0.0022                       | 1.00028                       | 0.99589                                                      | 1.00469                                                      | 0.9011         |
| Macular Edema                    | 1.9788          | 0.085                        | 7.23436                       | 6.12368                                                      | 8.54649                                                      | <.0001         |
| Year*Macular Edema               | -0.3057         | 0.0362                       | 0.7366                        | 0.68619                                                      | 0.79072                                                      | <.0001         |
| Year-squared*Macular Edema       | 0.0134          | 0.0036                       | 1.01353                       | 1.00638                                                      | 1.02073                                                      | 0.0002         |

|                                                            |         |        |         |         |         |        |
|------------------------------------------------------------|---------|--------|---------|---------|---------|--------|
| Exudative Macular degeneration                             | 2.1213  | 0.0745 | 8.34232 | 7.20907 | 9.65372 | <.0001 |
| Year*Exudative Macular degeneration                        | -0.2296 | 0.0335 | 0.79481 | 0.74433 | 0.84872 | <.0001 |
| Year-squared*Exudative Macular degeneration                | 0.007   | 0.0035 | 1.00704 | 1.00014 | 1.01398 | 0.0455 |
| Other retina conditions                                    | 0.8408  | 0.0426 | 2.31827 | 2.13265 | 2.52005 | <.0001 |
| Year*Other retinal conditions                              | -0.0051 | 0.0191 | 0.99496 | 0.9584  | 1.03291 | 0.7912 |
| Year-squared*Other retinal conditions                      | -0.0024 | 0.002  | 0.99761 | 0.99374 | 1.00149 | 0.2264 |
| Other nerve conditions                                     | 0.0832  | 0.0402 | 1.08674 | 1.00449 | 1.17571 | 0.0383 |
| Year*Other nerve conditions                                | -0.0303 | 0.0179 | 0.97019 | 0.93669 | 1.00489 | 0.0914 |
| Year-squared*Other nerve conditions                        | 0.0027  | 0.0019 | 1.00274 | 0.99911 | 1.00638 | 0.1399 |
| Non-Proliferative Diabetic Retinopathy                     | 0.6829  | 0.0189 | 1.97962 | 1.90775 | 2.05419 | <.0001 |
| Proliferative Diabetic Retinopathy                         | 0.4233  | 0.0285 | 1.52695 | 1.44399 | 1.61468 | <.0001 |
| Race: Blacks (vs Whites)                                   | 0.028   | 0.0222 | 1.02837 | 0.98453 | 1.07416 | 0.2082 |
| Race: Latinos (vs Whites)                                  | 0.0018  | 0.0244 | 1.00185 | 0.95514 | 1.05084 | 0.9396 |
| Race: Asians (vs Whites)                                   | 0.0067  | 0.035  | 1.00671 | 0.94005 | 1.07808 | 0.8484 |
| Race: Other races (vs Whites)                              | -0.0903 | 0.0558 | 0.91364 | 0.81905 | 1.01916 | 0.1053 |
| Insurance type: Commercial & Medicaid (vs Commercial only) | -0.2893 | 0.0527 | 0.74881 | 0.67536 | 0.83024 | <.0001 |
| Insurance type: Commercial & Medicare (vs Commercial only) | -0.043  | 0.0256 | 0.95791 | 0.9111  | 1.00713 | 0.0925 |
| Sex: Females (vs Males)                                    | -0.0018 | 0.0103 | 0.99824 | 0.97828 | 1.01861 | 0.8643 |
| Education: High school diploma (vs less than High School)  | 0.0125  | 0.0449 | 1.01262 | 0.92727 | 1.10582 | 0.7802 |
| Education: Some college (vs less than High School)         | -0.0365 | 0.0455 | 0.96418 | 0.88195 | 1.05407 | 0.4225 |
| Education: College diploma (vs less than High School)      | -0.1169 | 0.0469 | 0.88963 | 0.81143 | 0.97538 | 0.0127 |
| Education: Advanced degree (vs less than High School)      | 0.0327  | 0.1375 | 1.03319 | 0.78912 | 1.35276 | 0.8123 |
| Household Net Worth: 25K-75K (vs <25K)                     | -0.0068 | 0.0261 | 0.99325 | 0.94376 | 1.04532 | 0.7949 |
| Household Net Worth: 75K-150K (vs <25K)                    | -0.0239 | 0.0227 | 0.97641 | 0.93388 | 1.02086 | 0.2932 |
| Household Net Worth: 150K-500K (vs <25K)                   | 0.0381  | 0.0199 | 1.03883 | 0.99906 | 1.08019 | 0.0558 |
| Household Net Worth: >500K (vs <25K)                       | 0.0723  | 0.0234 | 1.07493 | 1.0267  | 1.12542 | 0.002  |
| US Region of residence: South-East (vs North-East)         | 0.0462  | 0.0149 | 1.04733 | 1.01717 | 1.07839 | 0.0019 |
| US Region of residence: Mid-West (vs North-East)           | -0.3044 | 0.0156 | 0.73759 | 0.71536 | 0.76052 | <.0001 |
| US Region of residence: West (vs North-East)               | -0.1966 | 0.0216 | 0.82152 | 0.78748 | 0.85704 | <.0001 |
| US Region of residence: Other regions (vs North-East)      | -0.3629 | 0.2685 | 0.69563 | 0.41099 | 1.1774  | 0.1765 |
| Insurance Plan: PPO (vs HMO)                               | 0.1413  | 0.0195 | 1.15179 | 1.10867 | 1.19659 | <.0001 |
| Insurance Plan: EPO (vs HMO)                               | 0.1092  | 0.0211 | 1.11542 | 1.07021 | 1.16254 | <.0001 |
| Insurance Plan: POS (vs HMO)                               | 0.1782  | 0.0157 | 1.19501 | 1.1589  | 1.23224 | <.0001 |
| Insurance Plan: IND (vs HMO)                               | 0.0624  | 0.0237 | 1.06435 | 1.01611 | 1.11489 | 0.0084 |
| Insurance Plan: Other plans (vs HMO)                       | -0.0995 | 0.0689 | 0.90527 | 0.79084 | 1.03626 | 0.1489 |
| Age                                                        | -0.0075 | 0.0006 | 0.9925  | 0.99132 | 0.99368 | <.0001 |
| Obesity                                                    | -0.0513 | 0.0149 | 0.94998 | 0.92259 | 0.97818 | 0.0006 |
| Hypertension                                               | 0.0464  | 0.0127 | 1.04747 | 1.02173 | 1.07387 | 0.0003 |

|                                                              |         |        |         |         |         |        |
|--------------------------------------------------------------|---------|--------|---------|---------|---------|--------|
| Hyperlipidemia                                               | -0.0038 | 0.0125 | 0.99626 | 0.97206 | 1.02106 | 0.7649 |
| Amount of time the person was covered under the plan (years) | 1.1966  | 0.0302 | 3.30883 | 3.11884 | 3.51039 | <.0001 |

HMO = health maintenance organization

IND = indemnity plan

PPO = preferred provider organization

EPO = exclusive provider organization

The fitted model coefficients reported here were used to predict odds (or probabilities) of the outcome for different groups of enrollees in different years. Various comparisons were then made between the estimated odds and these comparative odds were reported in the paper. While estimating these odds, all other predictors were assumed to be at their average value or reference value.



**Table 16: Logistic for fundus photography testing, including all provider types**

| Model Information           |          |
|-----------------------------|----------|
| Distribution                | Binomial |
| Link Function               | Logit    |
| Number of Observations Used | 2364531  |
| Number of Events            | 303455   |
| Number of Trials            | 2364531  |
| Missing Values              | 236      |

| Response Profile |                    |                 |
|------------------|--------------------|-----------------|
| Ordered Value    | Dependent variable | Total Frequency |
| 1                | 1                  | 303455          |
| 2                | 0                  | 2061076         |

PROC GENMOD is modeling the probability that dependent variable='1'.

| Generalized Estimating Equations Model Information |                 |
|----------------------------------------------------|-----------------|
| Correlation Structure                              | 8-Dependent     |
| Within-Subject Effect                              | year (9 levels) |
| Generalized Estimating Equations Fit Criteria      |                 |
| Quasi-likelihood Information Criterion             | 1710081.79      |

| Score Statistics For Type 3 Generalized Estimating Equations Analysis |                    |            |         |
|-----------------------------------------------------------------------|--------------------|------------|---------|
| Source                                                                | Degrees of Freedom | Chi-Square | p-value |
| Year                                                                  | 1                  | 10.18      | 0.0014  |
| Year-squared                                                          | 1                  | 9.39       | 0.0022  |
| Open-angle glaucoma                                                   | 1                  | 382.25     | <.0001  |
| Year*Open-angle glaucoma                                              | 1                  | 8.77       | 0.0031  |
| Year-squared*Open-angle glaucoma                                      | 1                  | 0.1        | 0.7478  |
| Glaucoma suspect                                                      | 1                  | 395.05     | <.0001  |
| Year*Glaucoma suspect                                                 | 1                  | 3.56       | 0.0592  |
| Year-squared*Glaucoma suspect                                         | 1                  | 1.39       | 0.2391  |
| Macular Edema                                                         | 1                  | 1181.59    | <.0001  |
| Year*Macular Edema                                                    | 1                  | 189.14     | <.0001  |
| Year-squared*Macular Edema                                            | 1                  | 29.31      | <.0001  |
| Exudative Macular degeneration                                        | 1                  | 1651.07    | <.0001  |
| Year*Exudative Macular degeneration                                   | 1                  | 137.1      | <.0001  |

|                                                                     |   |         |        |
|---------------------------------------------------------------------|---|---------|--------|
| <b>Year-squared*Exudative Macular degeneration</b>                  | 1 | 6.15    | 0.0132 |
| <b>Other retina conditions</b>                                      | 1 | 1538.46 | <.0001 |
| <b>Year*Other retinal conditions</b>                                | 1 | 20.82   | <.0001 |
| <b>Year-squared*Other retinal conditions</b>                        | 1 | 5.29    | 0.0214 |
| <b>Other nerve conditions</b>                                       | 1 | 36.35   | <.0001 |
| <b>Year*Other nerve conditions</b>                                  | 1 | 22.84   | <.0001 |
| <b>Year-squared*Other nerve conditions</b>                          | 1 | 19.61   | <.0001 |
| <b>Non-Proliferative Diabetic Retinopathy</b>                       | 1 | 4174.5  | <.0001 |
| <b>Proliferative Diabetic Retinopathy</b>                           | 1 | 862.14  | <.0001 |
| <b>Race</b>                                                         | 4 | 123.54  | <.0001 |
| <b>Insurance type</b>                                               | 2 | 192.48  | <.0001 |
| <b>Sex</b>                                                          | 1 | 1.49    | 0.2216 |
| <b>Education</b>                                                    | 4 | 142.02  | <.0001 |
| <b>Household Net Worth</b>                                          | 4 | 65.81   | <.0001 |
| <b>US Region of residence</b>                                       | 4 | 4181.82 | <.0001 |
| <b>Insurance plan</b>                                               | 5 | 527.78  | <.0001 |
| <b>Age</b>                                                          | 1 | 549.16  | <.0001 |
| <b>Obesity</b>                                                      | 1 | 15.79   | <.0001 |
| <b>Hypertension</b>                                                 | 1 | 39.66   | <.0001 |
| <b>Hyperlipidemia</b>                                               | 1 | 10.18   | 0.0014 |
| <b>Amount of time the person was covered under the plan (years)</b> | 1 | 13351.3 | <.0001 |
| <b>Eye-care</b>                                                     | 3 | 13545.5 | <.0001 |

| <b>Parameter estimates</b>       |                 |                              |                               |                                                              |                                                              |                |
|----------------------------------|-----------------|------------------------------|-------------------------------|--------------------------------------------------------------|--------------------------------------------------------------|----------------|
| <b>Parameter</b>                 | <b>Estimate</b> | <b>Std error of estimate</b> | <b>Exponentiated estimate</b> | <b>95% lower confidence limit for exponentiated estimate</b> | <b>95% upper confidence limit for exponentiated estimate</b> | <b>p-value</b> |
| Intercept                        | -3.5979         | 0.0368                       | 0.02738                       | 0.02548                                                      | 0.0294                                                       | <.0001         |
| Year                             | -0.0334         | 0.0101                       | 0.96718                       | 0.94823                                                      | 0.9865                                                       | 0.0009         |
| Year-squared                     | 0.0033          | 0.0011                       | 1.00333                       | 1.00126                                                      | 1.0054                                                       | 0.0016         |
| Open-angle glaucoma              | 0.4886          | 0.0237                       | 1.63002                       | 1.55604                                                      | 1.7075                                                       | <.0001         |
| Year*Open-angle glaucoma         | 0.0328          | 0.0108                       | 1.03337                       | 1.01176                                                      | 1.0554                                                       | 0.0023         |
| Year-squared*Open-angle glaucoma | -0.0004         | 0.0011                       | 0.99963                       | 0.99742                                                      | 1.0018                                                       | 0.7422         |
| Glaucoma suspect                 | 0.4836          | 0.0231                       | 1.62196                       | 1.55021                                                      | 1.697                                                        | <.0001         |
| Year*Glaucoma suspect            | -0.0205         | 0.0105                       | 0.97973                       | 0.95982                                                      | 1.0001                                                       | 0.0507         |
| Year-squared*Glaucoma suspect    | 0.0013          | 0.0011                       | 1.00132                       | 0.99919                                                      | 1.0035                                                       | 0.2257         |
| Macular Edema                    | 1.9898          | 0.043                        | 7.31373                       | 6.72198                                                      | 7.9576                                                       | <.0001         |
| Year*Macular Edema               | -0.2721         | 0.019                        | 0.76179                       | 0.73392                                                      | 0.7907                                                       | <.0001         |
| Year-squared*Macular Edema       | 0.0106          | 0.0019                       | 1.01068                       | 1.00684                                                      | 1.0145                                                       | <.0001         |
| Exudative Macular degeneration   | 2.2715          | 0.0405                       | 9.69386                       | 8.95474                                                      | 10.494                                                       | <.0001         |

|                                                            |         |        |         |         |        |        |
|------------------------------------------------------------|---------|--------|---------|---------|--------|--------|
| Year*Exudative Macular degeneration                        | -0.219  | 0.0186 | 0.80331 | 0.77457 | 0.8331 | <.0001 |
| Year-squared*Exudative Macular degeneration                | 0.0049  | 0.002  | 1.00486 | 1.00098 | 1.0088 | 0.014  |
| Other retina conditions                                    | 0.8709  | 0.0205 | 2.38909 | 2.29513 | 2.4869 | <.0001 |
| Year*Other retinal conditions                              | -0.0439 | 0.0093 | 0.95705 | 0.93975 | 0.9747 | <.0001 |
| Year-squared*Other retinal conditions                      | 0.0023  | 0.001  | 1.00229 | 1.00039 | 1.0042 | 0.0181 |
| Other nerve conditions                                     | 0.1241  | 0.0196 | 1.1321  | 1.08951 | 1.1764 | <.0001 |
| Year*Other nerve conditions                                | -0.0441 | 0.0089 | 0.95682 | 0.9403  | 0.9736 | <.0001 |
| Year-squared*Other nerve conditions                        | 0.0042  | 0.0009 | 1.00423 | 1.00241 | 1.006  | <.0001 |
| Non-Proliferative Diabetic Retinopathy                     | 0.7478  | 0.0097 | 2.1124  | 2.07254 | 2.153  | <.0001 |
| Proliferative Diabetic Retinopathy                         | 0.4828  | 0.0153 | 1.62055 | 1.57263 | 1.6699 | <.0001 |
| Race: Blacks (vs Whites)                                   | 0.0857  | 0.01   | 1.08944 | 1.06823 | 1.1111 | <.0001 |
| Race: Latinos (vs Whites)                                  | 0.056   | 0.0105 | 1.05762 | 1.03599 | 1.0797 | <.0001 |
| Race: Asians (vs Whites)                                   | 0.0936  | 0.0144 | 1.09815 | 1.0675  | 1.1297 | <.0001 |
| Race: Other races (vs Whites)                              | 0.0281  | 0.0253 | 1.0285  | 0.97866 | 1.0809 | 0.2676 |
| Insurance type: Commercial & Medicaid (vs Commercial only) | -0.3245 | 0.0273 | 0.7229  | 0.68526 | 0.7626 | <.0001 |
| Insurance type: Commercial & Medicare (vs Commercial only) | -0.0981 | 0.0131 | 0.90653 | 0.88359 | 0.9301 | <.0001 |
| Sex: Females (vs Males)                                    | 0.006   | 0.0049 | 1.00603 | 0.99637 | 1.0158 | 0.2221 |
| Education: High school diploma (vs less than High School)  | 0.0299  | 0.02   | 1.03038 | 0.99068 | 1.0717 | 0.1355 |
| Education: Some college (vs less than High School)         | 0.03    | 0.0203 | 1.0305  | 0.99028 | 1.0724 | 0.1391 |
| Education: College diploma (vs less than High School)      | -0.0462 | 0.021  | 0.95486 | 0.91641 | 0.9949 | 0.0276 |
| Education: Advanced degree (vs less than High School)      | -0.1367 | 0.0516 | 0.87226 | 0.78832 | 0.9651 | 0.0081 |
| Household Net Worth: 25K-75K (vs <25K)                     | -0.0247 | 0.0127 | 0.97558 | 0.95166 | 1.0001 | 0.051  |
| Household Net Worth: 75K-150K (vs <25K)                    | -0.0174 | 0.011  | 0.98279 | 0.96189 | 1.0041 | 0.1136 |
| Household Net Worth: 150K-500K (vs <25K)                   | 0.0234  | 0.0096 | 1.02371 | 1.00457 | 1.0432 | 0.015  |
| Household Net Worth: >500K (vs <25K)                       | 0.0487  | 0.0112 | 1.0499  | 1.02716 | 1.0731 | <.0001 |
| US Region of residence: South-East (vs North-East)         | 0.0334  | 0.0068 | 1.03396 | 1.02019 | 1.0479 | <.0001 |
| US Region of residence: Mid-West (vs North-East)           | -0.3172 | 0.0075 | 0.72817 | 0.71749 | 0.739  | <.0001 |
| US Region of residence: West (vs North-East)               | -0.2772 | 0.0096 | 0.75792 | 0.74386 | 0.7722 | <.0001 |
| US Region of residence: Other regions (vs North-East)      | -0.1549 | 0.0967 | 0.85653 | 0.70867 | 1.0352 | 0.1092 |
| Insurance Plan: PPO (vs HMO)                               | 0.06    | 0.0093 | 1.06183 | 1.04266 | 1.0814 | <.0001 |
| Insurance Plan: EPO (vs HMO)                               | 0.1042  | 0.0102 | 1.10981 | 1.08786 | 1.1322 | <.0001 |
| Insurance Plan: POS (vs HMO)                               | 0.1239  | 0.0077 | 1.13196 | 1.1149  | 1.1493 | <.0001 |
| Insurance Plan: IND (vs HMO)                               | -0.0331 | 0.0123 | 0.96746 | 0.94451 | 0.991  | 0.0069 |
| Insurance Plan: Other plans (vs HMO)                       | -0.3619 | 0.0411 | 0.69632 | 0.64249 | 0.7547 | <.0001 |
| Age                                                        | -0.0068 | 0.0003 | 0.99321 | 0.99265 | 0.9938 | <.0001 |
| Obesity                                                    | -0.0294 | 0.0074 | 0.97102 | 0.95695 | 0.9853 | <.0001 |
| Hypertension                                               | 0.0371  | 0.0059 | 1.03781 | 1.02586 | 1.0499 | <.0001 |

|                                                                               |         |        |         |         |        |        |
|-------------------------------------------------------------------------------|---------|--------|---------|---------|--------|--------|
| Hyperlipidemia                                                                | 0.0186  | 0.0058 | 1.01878 | 1.00717 | 1.0305 | 0.0015 |
| Amount of time the person was covered under the plan (years)                  | 1.256   | 0.0129 | 3.51144 | 3.42353 | 3.6016 | <.0001 |
| Eye-care: Visited unspecified eye provider (vs visited ophthalmologists only) | -0.4301 | 0.0436 | 0.65048 | 0.59725 | 0.7084 | <.0001 |
| Eye-care: Visited optometrists only (vs visited ophthalmologists only)        | 0.8147  | 0.0067 | 2.25847 | 2.22907 | 2.2883 | <.0001 |
| Eye-care: Visited both (vs visited ophthalmologists only)                     | 0.3951  | 0.0061 | 1.48456 | 1.46699 | 1.5023 | <.0001 |

HMO = health maintenance organization

IND = indemnity plan

PPO = preferred provider organization

EPO = exclusive provider organization

The fitted model coefficients reported here were used to predict odds (or probabilities) of the outcome for different groups of enrollees in different years. Various comparisons were then made between the estimated odds and these comparative odds were reported in the paper. While estimating these odds, all other predictors were assumed to be at their average value or reference value.

**Table 17: Logistic for fundus photography testing including all provider types, but only in open-angle glaucoma patients**

| Model Information           |          |
|-----------------------------|----------|
| Distribution                | Binomial |
| Link Function               | Logit    |
| Number of Observations Used | 463782   |
| Number of Events            | 66680    |
| Number of Trials            | 463782   |
| Missing Values              | 46       |

| Response Profile |                    |                 |
|------------------|--------------------|-----------------|
| Ordered Value    | Dependent variable | Total Frequency |
| 1                | 1                  | 66680           |
| 2                | 0                  | 397102          |

PROC GENMOD is modeling the probability that dependent variable='1'.

| Generalized Estimating Equations Model Information |                 |
|----------------------------------------------------|-----------------|
| Correlation Structure                              | 8-Dependent     |
| Within-Subject Effect                              | year (9 levels) |
| Generalized Estimating Equations Fit Criteria      |                 |
| Quasi-likelihood Information Criterion             | 363747.6116     |

| Score Statistics For Type 3 Generalized Estimating Equations Analysis |                    |            |         |
|-----------------------------------------------------------------------|--------------------|------------|---------|
| Source                                                                | Degrees of Freedom | Chi-Square | p-value |
| Year                                                                  | 1                  | 0.82       | 0.3638  |
| Year-squared                                                          | 1                  | 7.29       | 0.0069  |
| Macular Edema                                                         | 1                  | 148.25     | <.0001  |
| Year*Macular Edema                                                    | 1                  | 33.98      | <.0001  |
| Year-squared*Macular Edema                                            | 1                  | 8.25       | 0.0041  |
| Exudative Macular degeneration                                        | 1                  | 155.68     | <.0001  |
| Year*Exudative Macular degeneration                                   | 1                  | 14.1       | 0.0002  |
| Year-squared*Exudative Macular degeneration                           | 1                  | 0.7        | 0.4013  |
| Other retina conditions                                               | 1                  | 343.67     | <.0001  |
| Year*Other retinal conditions                                         | 1                  | 20.53      | <.0001  |
| Year-squared*Other retinal conditions                                 | 1                  | 6.41       | 0.0113  |
| Other nerve conditions                                                | 1                  | 19.09      | <.0001  |

|                                                                     |   |         |        |
|---------------------------------------------------------------------|---|---------|--------|
| <b>Year*Other nerve conditions</b>                                  | 1 | 1.99    | 0.1584 |
| <b>Year-squared*Other nerve conditions</b>                          | 1 | 1.39    | 0.2382 |
| <b>Non-Proliferative Diabetic Retinopathy</b>                       | 1 | 515.01  | <.0001 |
| <b>Proliferative Diabetic Retinopathy</b>                           | 1 | 113.43  | <.0001 |
| <b>Race</b>                                                         | 4 | 50.14   | <.0001 |
| <b>Insurance type</b>                                               | 2 | 54.17   | <.0001 |
| <b>Sex</b>                                                          | 1 | 14.98   | 0.0001 |
| <b>Education</b>                                                    | 4 | 34.07   | <.0001 |
| <b>Household Net Worth</b>                                          | 4 | 38.36   | <.0001 |
| <b>US Region of residence</b>                                       | 4 | 1167.34 | <.0001 |
| <b>Insurance plan</b>                                               | 5 | 187.62  | <.0001 |
| <b>Age</b>                                                          | 1 | 176.96  | <.0001 |
| <b>Obesity</b>                                                      | 1 | 8.42    | 0.0037 |
| <b>Hypertension</b>                                                 | 1 | 0.06    | 0.7998 |
| <b>Hyperlipidemia</b>                                               | 1 | 33.99   | <.0001 |
| <b>Amount of time the person was covered under the plan (years)</b> | 1 | 3631.56 | <.0001 |
| <b>Eye-care</b>                                                     | 3 | 1288.8  | <.0001 |

| <b>Parameter estimates</b>                  |                 |                              |                               |                                                              |                                                              |                |
|---------------------------------------------|-----------------|------------------------------|-------------------------------|--------------------------------------------------------------|--------------------------------------------------------------|----------------|
| <b>Parameter</b>                            | <b>Estimate</b> | <b>Std error of estimate</b> | <b>Exponentiated estimate</b> | <b>95% lower confidence limit for exponentiated estimate</b> | <b>95% upper confidence limit for exponentiated estimate</b> | <b>p-value</b> |
| Intercept                                   | -3.1974         | 0.0655                       | 0.04087                       | 0.03594                                                      | 0.04647                                                      | <.0001         |
| Year                                        | 0.0085          | 0.0091                       | 1.00853                       | 0.99072                                                      | 1.02666                                                      | 0.3501         |
| Year-squared                                | 0.0028          | 0.001                        | 1.00276                       | 1.00081                                                      | 1.00471                                                      | 0.0055         |
| Macular Edema                               | 1.8435          | 0.1213                       | 6.31876                       | 4.98145                                                      | 8.01508                                                      | <.0001         |
| Year*Macular Edema                          | -0.3105         | 0.0518                       | 0.73309                       | 0.66237                                                      | 0.81136                                                      | <.0001         |
| Year-squared*Macular Edema                  | 0.0149          | 0.0052                       | 1.01498                       | 1.00477                                                      | 1.0253                                                       | 0.004          |
| Exudative Macular degeneration              | 1.8434          | 0.1193                       | 6.31793                       | 5.00071                                                      | 7.98212                                                      | <.0001         |
| Year*Exudative Macular degeneration         | -0.1967         | 0.0523                       | 0.82142                       | 0.74143                                                      | 0.91004                                                      | 0.0002         |
| Year-squared*Exudative Macular degeneration | 0.0045          | 0.0054                       | 1.00448                       | 0.99396                                                      | 1.01512                                                      | 0.4052         |
| Other retina conditions                     | 0.872           | 0.0403                       | 2.39175                       | 2.21028                                                      | 2.58812                                                      | <.0001         |
| Year*Other retinal conditions               | -0.0867         | 0.0184                       | 0.91691                       | 0.88436                                                      | 0.95066                                                      | <.0001         |
| Year-squared*Other retinal conditions       | 0.005           | 0.0019                       | 1.00501                       | 1.00122                                                      | 1.00882                                                      | 0.0096         |

|                                                                               |         |        |         |         |         |        |
|-------------------------------------------------------------------------------|---------|--------|---------|---------|---------|--------|
| Other nerve conditions                                                        | 0.1668  | 0.0364 | 1.18149 | 1.10016 | 1.26883 | <.0001 |
| Year*Other nerve conditions                                                   | -0.0241 | 0.0167 | 0.97619 | 0.94484 | 1.00858 | 0.1478 |
| Year-squared*Other nerve conditions                                           | 0.0021  | 0.0017 | 1.00209 | 0.99868 | 1.00551 | 0.2298 |
| Non-Proliferative Diabetic Retinopathy                                        | 0.5383  | 0.0209 | 1.71304 | 1.64424 | 1.78472 | <.0001 |
| Proliferative Diabetic Retinopathy                                            | 0.3718  | 0.0329 | 1.45037 | 1.35985 | 1.54692 | <.0001 |
| Race: Blacks (vs Whites)                                                      | 0.0886  | 0.0181 | 1.09266 | 1.05465 | 1.13204 | <.0001 |
| Race: Latinos (vs Whites)                                                     | 0.0427  | 0.0236 | 1.04365 | 0.99644 | 1.09311 | 0.0704 |
| Race: Asians (vs Whites)                                                      | 0.1659  | 0.0316 | 1.18048 | 1.10966 | 1.25582 | <.0001 |
| Race: Other races (vs Whites)                                                 | -0.0772 | 0.0606 | 0.92569 | 0.82207 | 1.04237 | 0.2024 |
| Insurance type: Commercial & Medicaid (vs Commercial only)                    | -0.3985 | 0.0608 | 0.67135 | 0.59589 | 0.75636 | <.0001 |
| Insurance type: Commercial & Medicare (vs Commercial only)                    | 0.002   | 0.0261 | 1.00196 | 0.95201 | 1.05454 | 0.9401 |
| Sex: Females (vs Males)                                                       | 0.0422  | 0.0109 | 1.04306 | 1.021   | 1.0656  | 0.0001 |
| Education: High school diploma (vs less than High School)                     | 0.0459  | 0.039  | 1.04696 | 0.97    | 1.13002 | 0.2388 |
| Education: Some college (vs less than High School)                            | 0.0489  | 0.0398 | 1.05015 | 0.97144 | 1.13525 | 0.2183 |
| Education: College diploma (vs less than High School)                         | -0.0375 | 0.0416 | 0.96315 | 0.88765 | 1.04507 | 0.3673 |
| Education: Advanced degree (vs less than High School)                         | -0.1367 | 0.1189 | 0.87219 | 0.69094 | 1.10099 | 0.2499 |
| Household Net Worth: 25K-75K (vs <25K)                                        | -0.0194 | 0.0276 | 0.98079 | 0.92915 | 1.0353  | 0.4822 |
| Household Net Worth: 75K-150K (vs <25K)                                       | 0.0316  | 0.0237 | 1.03206 | 0.98517 | 1.08118 | 0.1835 |
| Household Net Worth: 150K-500K (vs <25K)                                      | 0.0581  | 0.0209 | 1.05985 | 1.01736 | 1.10413 | 0.0054 |
| Household Net Worth: >500K (vs <25K)                                          | 0.1191  | 0.0245 | 1.12653 | 1.07374 | 1.18191 | <.0001 |
| US Region of residence: South-East (vs North-East)                            | -0.0204 | 0.0153 | 0.97985 | 0.95091 | 1.00967 | 0.1833 |
| US Region of residence: Mid-West (vs North-East)                              | -0.4081 | 0.0172 | 0.66489 | 0.64282 | 0.68772 | <.0001 |
| US Region of residence: West (vs North-East)                                  | -0.4105 | 0.0215 | 0.66331 | 0.63598 | 0.69181 | <.0001 |
| US Region of residence: Other regions (vs North-East)                         | -0.4113 | 0.2616 | 0.66281 | 0.3969  | 1.10687 | 0.116  |
| Insurance Plan: PPO (vs HMO)                                                  | 0.0716  | 0.0211 | 1.07418 | 1.03074 | 1.11945 | 0.0007 |
| Insurance Plan: EPO (vs HMO)                                                  | 0.1613  | 0.0237 | 1.17506 | 1.1217  | 1.23096 | <.0001 |
| Insurance Plan: POS (vs HMO)                                                  | 0.1598  | 0.0185 | 1.17325 | 1.13154 | 1.2165  | <.0001 |
| Insurance Plan: IND (vs HMO)                                                  | -0.0323 | 0.0256 | 0.96821 | 0.92089 | 1.01796 | 0.2063 |
| Insurance Plan: Other plans (vs HMO)                                          | -0.4469 | 0.0796 | 0.6396  | 0.54719 | 0.74762 | <.0001 |
| Age                                                                           | -0.0084 | 0.0006 | 0.99167 | 0.99045 | 0.9929  | <.0001 |
| Obesity                                                                       | -0.048  | 0.0167 | 0.95312 | 0.92244 | 0.98482 | 0.004  |
| Hypertension                                                                  | -0.0035 | 0.0138 | 0.99652 | 0.96999 | 1.02377 | 0.7999 |
| Hyperlipidemia                                                                | 0.0773  | 0.0134 | 1.08039 | 1.0524  | 1.10913 | <.0001 |
| Amount of time the person was covered under the plan (years)                  | 1.4686  | 0.0296 | 4.34323 | 4.09877 | 4.60226 | <.0001 |
| Eye-care: Visited unspecified eye provider (vs visited ophthalmologists only) | -0.7694 | 0.1256 | 0.4633  | 0.36218 | 0.59264 | <.0001 |

|                                                                        |        |        |         |         |         |        |
|------------------------------------------------------------------------|--------|--------|---------|---------|---------|--------|
| Eye-care: Visited optometrists only (vs visited ophthalmologists only) | 0.6768 | 0.019  | 1.9676  | 1.89572 | 2.04221 | <.0001 |
| Eye-care: Visited both (vs visited ophthalmologists only)              | 0.283  | 0.0131 | 1.32713 | 1.29355 | 1.36159 | <.0001 |

HMO = health maintenance organization

IND = indemnity plan

PPO = preferred provider organization

EPO = exclusive provider organization

The fitted model coefficients reported here were used to predict odds (or probabilities) of the outcome for different groups of enrollees in different years. Various comparisons were then made between the estimated odds and these comparative odds were reported in the paper. While estimating these odds, all other predictors were assumed to be at their average value or reference value.



**Table 18: Logistic for visual field testing for those under the exclusive care of optometrists**

| Model Information           |          |
|-----------------------------|----------|
| Distribution                | Binomial |
| Link Function               | Logit    |
| Number of Observations Used | 242318   |
| Number of Events            | 73269    |
| Number of Trials            | 242318   |
| Missing Values              | 32       |

| Response Profile |                    |                 |
|------------------|--------------------|-----------------|
| Ordered Value    | Dependent variable | Total Frequency |
| 1                | 1                  | 73269           |
| 2                | 0                  | 169049          |

PROC GENMOD is modeling the probability that dependent variable='1'.

| Generalized Estimating Equations Model Information |                 |
|----------------------------------------------------|-----------------|
| Correlation Structure                              | 8-Dependent     |
| Within-Subject Effect                              | year (9 levels) |

| Generalized Estimating Equations Fit Criteria |             |
|-----------------------------------------------|-------------|
| Quasi-likelihood Information Criterion        | 285923.7392 |

| Score Statistics For Type 3 Generalized Estimating Equations Analysis |                    |            |         |
|-----------------------------------------------------------------------|--------------------|------------|---------|
| Source                                                                | Degrees of Freedom | Chi-Square | p-value |
| Year                                                                  | 1                  | 28.34      | <.0001  |
| Year-squared                                                          | 1                  | 5.28       | 0.0215  |
| Open-angle glaucoma                                                   | 1                  | 215.37     | <.0001  |
| Year*Open-angle glaucoma                                              | 1                  | 0.34       | 0.5603  |
| Year-squared*Open-angle glaucoma                                      | 1                  | 0.13       | 0.7197  |
| Glaucoma suspect                                                      | 1                  | 138.06     | <.0001  |
| Year*Glaucoma suspect                                                 | 1                  | 3.46       | 0.063   |
| Year-squared*Glaucoma suspect                                         | 1                  | 1.52       | 0.2178  |
| Other nerve conditions                                                | 1                  | 54.56      | <.0001  |
| Year*Other nerve conditions                                           | 1                  | 0.02       | 0.8915  |
| Year-squared*Other nerve conditions                                   | 1                  | 0.49       | 0.4849  |
| Macular Edema                                                         | 1                  | 11.71      | 0.0006  |
| Exudative Macular degeneration                                        | 1                  | 0.22       | 0.6413  |

|                                                                     |   |         |        |
|---------------------------------------------------------------------|---|---------|--------|
| <b>Other retina conditions</b>                                      | 1 | 23.65   | <.0001 |
| <b>Non-Proliferative Diabetic Retinopathy</b>                       | 1 | 9.35    | 0.0022 |
| <b>Proliferative Diabetic Retinopathy</b>                           | 1 | 1.07    | 0.3003 |
| <b>Race</b>                                                         | 4 | 46.86   | <.0001 |
| <b>Insurance type</b>                                               | 2 | 23.96   | <.0001 |
| <b>Sex</b>                                                          | 1 | 47.18   | <.0001 |
| <b>Education</b>                                                    | 4 | 22.87   | 0.0001 |
| <b>Household Net Worth</b>                                          | 4 | 39.07   | <.0001 |
| <b>US Region of residence</b>                                       | 4 | 76.45   | <.0001 |
| <b>Insurance plan</b>                                               | 5 | 499.61  | <.0001 |
| <b>Age</b>                                                          | 1 | 9.47    | 0.0021 |
| <b>Obesity</b>                                                      | 1 | 0.94    | 0.3313 |
| <b>Hypertension</b>                                                 | 1 | 2.22    | 0.1361 |
| <b>Hyperlipidemia</b>                                               | 1 | 1.37    | 0.2412 |
| <b>Amount of time the person was covered under the plan (years)</b> | 1 | 3030.42 | <.0001 |

| <b>Parameter estimates</b>             |                 |                              |                               |                                                              |                                                              |                |
|----------------------------------------|-----------------|------------------------------|-------------------------------|--------------------------------------------------------------|--------------------------------------------------------------|----------------|
| <b>Parameter</b>                       | <b>Estimate</b> | <b>Std error of estimate</b> | <b>Exponentiated estimate</b> | <b>95% lower confidence limit for exponentiated estimate</b> | <b>95% upper confidence limit for exponentiated estimate</b> | <b>p-value</b> |
| Intercept                              | -2.3162         | 0.1164                       | 0.09865                       | 0.07853                                                      | 0.12393                                                      | <.0001         |
| Year                                   | -0.2152         | 0.0399                       | 0.80634                       | 0.74564                                                      | 0.87199                                                      | <.0001         |
| Year-squared                           | 0.0092          | 0.004                        | 1.00922                       | 1.00136                                                      | 1.01715                                                      | 0.0214         |
| Open-angle glaucoma                    | 1.3945          | 0.0983                       | 4.03297                       | 3.3259                                                       | 4.89036                                                      | <.0001         |
| Year*Open-angle glaucoma               | 0.0241          | 0.0417                       | 1.02443                       | 0.94398                                                      | 1.11174                                                      | 0.5629         |
| Year-squared*Open-angle glaucoma       | 0.0015          | 0.0042                       | 1.00149                       | 0.99334                                                      | 1.00971                                                      | 0.721          |
| Glaucoma suspect                       | 1.0549          | 0.0922                       | 2.87162                       | 2.39698                                                      | 3.44025                                                      | <.0001         |
| Year*Glaucoma suspect                  | -0.0721         | 0.0393                       | 0.93041                       | 0.86143                                                      | 1.00492                                                      | 0.0665         |
| Year-squared*Glaucoma suspect          | 0.0048          | 0.0039                       | 1.00482                       | 0.99712                                                      | 1.01259                                                      | 0.2202         |
| Other nerve conditions                 | 0.5727          | 0.0818                       | 1.77299                       | 1.51033                                                      | 2.08132                                                      | <.0001         |
| Year*Other nerve conditions            | -0.0046         | 0.0343                       | 0.99545                       | 0.93074                                                      | 1.06467                                                      | 0.8943         |
| Year-squared*Other nerve conditions    | -0.0023         | 0.0034                       | 0.99769                       | 0.99114                                                      | 1.00429                                                      | 0.4925         |
| Macular Edema                          | 0.4822          | 0.1318                       | 1.61969                       | 1.25097                                                      | 2.09709                                                      | 0.0003         |
| Exudative Macular degeneration         | 0.0739          | 0.16                         | 1.0767                        | 0.7868                                                       | 1.4734                                                       | 0.6443         |
| Other retina conditions                | -0.0916         | 0.0191                       | 0.91251                       | 0.87894                                                      | 0.94736                                                      | <.0001         |
| Non-Proliferative Diabetic Retinopathy | 0.1245          | 0.0404                       | 1.13255                       | 1.04624                                                      | 1.22598                                                      | 0.0021         |
| Proliferative Diabetic Retinopathy     | -0.182          | 0.1794                       | 0.8336                        | 0.58646                                                      | 1.18489                                                      | 0.3104         |
| Race: Blacks (vs Whites)               | 0.0731          | 0.0233                       | 1.07587                       | 1.02789                                                      | 1.1261                                                       | 0.0017         |
| Race: Latinos (vs Whites)              | 0.1111          | 0.0269                       | 1.11748                       | 1.06013                                                      | 1.17794                                                      | <.0001         |
| Race: Asians (vs Whites)               | 0.1913          | 0.0386                       | 1.21077                       | 1.12247                                                      | 1.30602                                                      | <.0001         |

|                                                              |         |        |         |         |         |        |
|--------------------------------------------------------------|---------|--------|---------|---------|---------|--------|
| Race: Other races (vs Whites)                                | 0.0385  | 0.0647 | 1.03927 | 0.91555 | 1.17969 | 0.5514 |
| Insurance type: Commercial & Medicaid (vs Commercial only)   | -0.0315 | 0.0514 | 0.96901 | 0.87622 | 1.07163 | 0.5399 |
| Insurance type: Commercial & Medicare (vs Commercial only)   | -0.1673 | 0.0346 | 0.84598 | 0.79045 | 0.9054  | <.0001 |
| Sex: Females (vs Males)                                      | 0.0761  | 0.0112 | 1.07907 | 1.05564 | 1.10301 | <.0001 |
| Education: High school diploma (vs less than High School)    | -0.0916 | 0.0499 | 0.91249 | 0.82752 | 1.00617 | 0.0663 |
| Education: Some college (vs less than High School)           | -0.0378 | 0.0506 | 0.96288 | 0.87203 | 1.0632  | 0.4545 |
| Education: College diploma (vs less than High School)        | -0.0832 | 0.0522 | 0.92016 | 0.83064 | 1.01934 | 0.1111 |
| Education: Advanced degree (vs less than High School)        | -0.2233 | 0.175  | 0.7999  | 0.56763 | 1.12722 | 0.2021 |
| Household Net Worth: 25K-75K (vs <25K)                       | 0.0296  | 0.0269 | 1.03008 | 0.97717 | 1.08584 | 0.2706 |
| Household Net Worth: 75K-150K (vs <25K)                      | 0.0211  | 0.0233 | 1.02133 | 0.97571 | 1.06908 | 0.3653 |
| Household Net Worth: 150K-500K (vs <25K)                     | 0.0667  | 0.0209 | 1.06896 | 1.02603 | 1.11368 | 0.0014 |
| Household Net Worth: >500K (vs <25K)                         | 0.1387  | 0.0256 | 1.14878 | 1.09265 | 1.2078  | <.0001 |
| US Region of residence: South-East (vs North-East)           | 0.0517  | 0.0166 | 1.05311 | 1.01936 | 1.08797 | 0.0018 |
| US Region of residence: Mid-West (vs North-East)             | 0.0773  | 0.0166 | 1.08031 | 1.04573 | 1.11604 | <.0001 |
| US Region of residence: West (vs North-East)                 | 0.2025  | 0.024  | 1.22451 | 1.16828 | 1.28344 | <.0001 |
| US Region of residence: Other regions (vs North-East)        | 0.1875  | 0.2369 | 1.20625 | 0.75823 | 1.919   | 0.4286 |
| Insurance Plan: PPO (vs HMO)                                 | 0.2513  | 0.02   | 1.28573 | 1.23634 | 1.33709 | <.0001 |
| Insurance Plan: EPO (vs HMO)                                 | 0.2907  | 0.0212 | 1.33737 | 1.28305 | 1.39399 | <.0001 |
| Insurance Plan: POS (vs HMO)                                 | 0.3245  | 0.0154 | 1.38337 | 1.34212 | 1.42589 | <.0001 |
| Insurance Plan: IND (vs HMO)                                 | 0.1057  | 0.0374 | 1.11144 | 1.03288 | 1.19596 | 0.0047 |
| Insurance Plan: Other plans (vs HMO)                         | -0.2124 | 0.0972 | 0.80867 | 0.66839 | 0.9784  | 0.0289 |
| Age                                                          | -0.0023 | 0.0007 | 0.99772 | 0.99627 | 0.99918 | 0.0022 |
| Obesity                                                      | -0.0164 | 0.0171 | 0.98371 | 0.95131 | 1.01722 | 0.3366 |
| Hypertension                                                 | -0.0188 | 0.0127 | 0.98137 | 0.95716 | 1.00619 | 0.1399 |
| Hyperlipidemia                                               | 0.0146  | 0.0126 | 1.01472 | 0.98998 | 1.04009 | 0.2458 |
| Amount of time the person was covered under the plan (years) | 1.3624  | 0.0264 | 3.90558 | 3.70878 | 4.11282 | <.0001 |

HMO = health maintenance organization  
IND = indemnity plan  
PPO = preferred provider organization  
EPO = exclusive provider organization

The fitted model coefficients reported here were used to predict odds (or probabilities) of the outcome for different groups of enrollees in different years. Various comparisons were then made between the

estimated odds and these comparative odds were reported in the paper. While estimating these odds, all other predictors were assumed to be at their average value or reference value.

**Table 19: Logistic for visual field testing for those under the exclusive care of ophthalmologists**

| Model Information           |          |
|-----------------------------|----------|
| Distribution                | Binomial |
| Link Function               | Logit    |
| Number of Observations Used | 1073736  |
| Number of Events            | 370030   |
| Number of Trials            | 1073736  |
| Missing Values              | 110      |

| Response Profile |                    |                 |
|------------------|--------------------|-----------------|
| Ordered Value    | Dependent variable | Total Frequency |
| 1                | 1                  | 370030          |
| 2                | 0                  | 703706          |

PROC GENMOD is modeling the probability that dependent variable='1'.

| Generalized Estimating Equations Model Information |                 |
|----------------------------------------------------|-----------------|
| Correlation Structure                              | 8-Dependent     |
| Within-Subject Effect                              | year (9 levels) |

| Generalized Estimating Equations Fit Criteria |             |
|-----------------------------------------------|-------------|
| Quasi-likelihood Information Criterion        | 1271873.168 |

| Score Statistics For Type 3 Generalized Estimating Equations Analysis |                    |            |         |
|-----------------------------------------------------------------------|--------------------|------------|---------|
| Source                                                                | Degrees of Freedom | Chi-Square | p-value |
| Year                                                                  | 1                  | 199.44     | <.0001  |
| Year-squared                                                          | 1                  | 30.99      | <.0001  |
| Open-angle glaucoma                                                   | 1                  | 2954.81    | <.0001  |
| Year*Open-angle glaucoma                                              | 1                  | 12.21      | 0.0005  |
| Year-squared*Open-angle glaucoma                                      | 1                  | 0.78       | 0.3763  |
| Glaucoma suspect                                                      | 1                  | 1151.72    | <.0001  |
| Year*Glaucoma suspect                                                 | 1                  | 1.64       | 0.1997  |
| Year-squared*Glaucoma suspect                                         | 1                  | 5.13       | 0.0236  |
| Other nerve conditions                                                | 1                  | 450.51     | <.0001  |
| Year*Other nerve conditions                                           | 1                  | 17.56      | <.0001  |
| Year-squared*Other nerve conditions                                   | 1                  | 8.38       | 0.0038  |

|                                                                     |   |         |        |
|---------------------------------------------------------------------|---|---------|--------|
| <b>Macular Edema</b>                                                | 1 | 18.89   | <.0001 |
| <b>Exudative Macular degeneration</b>                               | 1 | 50.55   | <.0001 |
| <b>Other retina conditions</b>                                      | 1 | 676.7   | <.0001 |
| <b>Non-Proliferative Diabetic Retinopathy</b>                       | 1 | 4.88    | 0.0272 |
| <b>Proliferative Diabetic Retinopathy</b>                           | 1 | 327.12  | <.0001 |
| <b>Race</b>                                                         | 4 | 71.64   | <.0001 |
| <b>Insurance type</b>                                               | 2 | 132.5   | <.0001 |
| <b>Sex</b>                                                          | 1 | 96.8    | <.0001 |
| <b>Education</b>                                                    | 4 | 80.61   | <.0001 |
| <b>Household Net Worth</b>                                          | 4 | 141.41  | <.0001 |
| <b>US Region of residence</b>                                       | 4 | 73.8    | <.0001 |
| <b>Insurance plan</b>                                               | 5 | 275.33  | <.0001 |
| <b>Age</b>                                                          | 1 | 11.02   | 0.0009 |
| <b>Obesity</b>                                                      | 1 | 34.92   | <.0001 |
| <b>Hypertension</b>                                                 | 1 | 14.8    | 0.0001 |
| <b>Hyperlipidemia</b>                                               | 1 | 131.51  | <.0001 |
| <b>Amount of time the person was covered under the plan (years)</b> | 1 | 18245.6 | <.0001 |

| <b>Parameter estimates</b>             |                 |                              |                               |                                                              |                                                              |                |
|----------------------------------------|-----------------|------------------------------|-------------------------------|--------------------------------------------------------------|--------------------------------------------------------------|----------------|
| <b>Parameter</b>                       | <b>Estimate</b> | <b>Std error of estimate</b> | <b>Exponentiated estimate</b> | <b>95% lower confidence limit for exponentiated estimate</b> | <b>95% upper confidence limit for exponentiated estimate</b> | <b>p-value</b> |
| Intercept                              | -2.9763         | 0.0435                       | 0.05098                       | 0.04681                                                      | 0.05552                                                      | <.0001         |
| Year                                   | -0.2009         | 0.0138                       | 0.818                         | 0.79614                                                      | 0.84048                                                      | <.0001         |
| Year-squared                           | 0.0085          | 0.0015                       | 1.00852                       | 1.00557                                                      | 1.01147                                                      | <.0001         |
| Open-angle glaucoma                    | 1.5776          | 0.0289                       | 4.84326                       | 4.57689                                                      | 5.12514                                                      | <.0001         |
| Year*Open-angle glaucoma               | 0.048           | 0.0135                       | 1.04922                       | 1.02185                                                      | 1.07732                                                      | 0.0004         |
| Year-squared*Open-angle glaucoma       | 0.0013          | 0.0015                       | 1.00131                       | 0.99846                                                      | 1.00416                                                      | 0.368          |
| Glaucoma suspect                       | 0.9982          | 0.0293                       | 2.71343                       | 2.56207                                                      | 2.87373                                                      | <.0001         |
| Year*Glaucoma suspect                  | -0.0181         | 0.0139                       | 0.98211                       | 0.95579                                                      | 1.00915                                                      | 0.1927         |
| Year-squared*Glaucoma suspect          | 0.0034          | 0.0015                       | 1.00345                       | 1.00051                                                      | 1.00639                                                      | 0.0214         |
| Other nerve conditions                 | 0.471           | 0.0227                       | 1.60167                       | 1.53191                                                      | 1.6746                                                       | <.0001         |
| Year*Other nerve conditions            | -0.0431         | 0.0104                       | 0.95782                       | 0.93845                                                      | 0.97758                                                      | <.0001         |
| Year-squared*Other nerve conditions    | 0.0031          | 0.0011                       | 1.00315                       | 1.001                                                        | 1.00531                                                      | 0.0041         |
| Macular Edema                          | -0.0947         | 0.022                        | 0.90965                       | 0.8713                                                       | 0.94969                                                      | <.0001         |
| Exudative Macular degeneration         | -0.194          | 0.0277                       | 0.82365                       | 0.78007                                                      | 0.86966                                                      | <.0001         |
| Other retina conditions                | -0.1851         | 0.0072                       | 0.831                         | 0.81933                                                      | 0.84283                                                      | <.0001         |
| Non-Proliferative Diabetic Retinopathy | -0.0291         | 0.0132                       | 0.97137                       | 0.94649                                                      | 0.9969                                                       | 0.0282         |
| Proliferative Diabetic Retinopathy     | -0.4323         | 0.0242                       | 0.64903                       | 0.61894                                                      | 0.68059                                                      | <.0001         |
| Race: Blacks (vs Whites)               | 0.053           | 0.0107                       | 1.05445                       | 1.0326                                                       | 1.07675                                                      | <.0001         |

|                                                              |         |        |         |         |         |        |
|--------------------------------------------------------------|---------|--------|---------|---------|---------|--------|
| Race: Latinos (vs Whites)                                    | 0.0069  | 0.0112 | 1.00687 | 0.98502 | 1.02921 | 0.5406 |
| Race: Asians (vs Whites)                                     | 0.1033  | 0.0146 | 1.10877 | 1.07745 | 1.14101 | <.0001 |
| Race: Other races (vs Whites)                                | 0.0147  | 0.0275 | 1.01476 | 0.96155 | 1.07093 | 0.5939 |
| Insurance type: Commercial & Medicaid (vs Commercial only)   | -0.0533 | 0.0315 | 0.94811 | 0.89143 | 1.00839 | 0.0902 |
| Insurance type: Commercial & Medicare (vs Commercial only)   | -0.1636 | 0.0143 | 0.84909 | 0.8256  | 0.87325 | <.0001 |
| Sex: Females (vs Males)                                      | 0.0544  | 0.0056 | 1.05586 | 1.04443 | 1.06742 | <.0001 |
| Education: High school diploma (vs less than High School)    | -0.0203 | 0.0216 | 0.97991 | 0.93929 | 1.02229 | 0.3476 |
| Education: Some college (vs less than High School)           | -0.0091 | 0.0219 | 0.99097 | 0.94939 | 1.03437 | 0.6783 |
| Education: College diploma (vs less than High School)        | -0.0746 | 0.0226 | 0.92813 | 0.88798 | 0.97009 | 0.0009 |
| Education: Advanced degree (vs less than High School)        | -0.0983 | 0.0498 | 0.90639 | 0.82204 | 0.99939 | 0.0486 |
| Household Net Worth: 25K-75K (vs <25K)                       | 0.0136  | 0.015  | 1.01369 | 0.98439 | 1.04387 | 0.3636 |
| Household Net Worth: 75K-150K (vs <25K)                      | 0.0474  | 0.0129 | 1.04858 | 1.02232 | 1.07552 | 0.0002 |
| Household Net Worth: 150K-500K (vs <25K)                     | 0.0986  | 0.0113 | 1.10367 | 1.07955 | 1.12834 | <.0001 |
| Household Net Worth: >500K (vs <25K)                         | 0.1208  | 0.0127 | 1.12846 | 1.10063 | 1.15698 | <.0001 |
| US Region of residence: South-East (vs North-East)           | 0.0105  | 0.0079 | 1.01058 | 0.99512 | 1.02629 | 0.181  |
| US Region of residence: Mid-West (vs North-East)             | 0.0114  | 0.0086 | 1.01147 | 0.99453 | 1.0287  | 0.1857 |
| US Region of residence: West (vs North-East)                 | 0.0762  | 0.0099 | 1.07917 | 1.05839 | 1.10035 | <.0001 |
| US Region of residence: Other regions (vs North-East)        | -0.172  | 0.1005 | 0.84199 | 0.69142 | 1.02535 | 0.0871 |
| Insurance Plan: PPO (vs HMO)                                 | 0.0129  | 0.0104 | 1.01299 | 0.9926  | 1.03381 | 0.2134 |
| Insurance Plan: EPO (vs HMO)                                 | 0.1232  | 0.0116 | 1.13111 | 1.10559 | 1.15722 | <.0001 |
| Insurance Plan: POS (vs HMO)                                 | 0.0851  | 0.0089 | 1.0888  | 1.07001 | 1.10793 | <.0001 |
| Insurance Plan: IND (vs HMO)                                 | -0.016  | 0.0136 | 0.98411 | 0.95823 | 1.01069 | 0.2387 |
| Insurance Plan: Other plans (vs HMO)                         | -0.309  | 0.0471 | 0.73417 | 0.66939 | 0.80521 | <.0001 |
| Age                                                          | 0.0011  | 0.0003 | 1.00111 | 1.00045 | 1.00177 | 0.0009 |
| Obesity                                                      | -0.0505 | 0.0086 | 0.95075 | 0.93485 | 0.96692 | <.0001 |
| Hypertension                                                 | 0.0252  | 0.0066 | 1.02552 | 1.01237 | 1.03885 | 0.0001 |
| Hyperlipidemia                                               | 0.0753  | 0.0066 | 1.07825 | 1.06437 | 1.09231 | <.0001 |
| Amount of time the person was covered under the plan (years) | 1.7213  | 0.0135 | 5.59161 | 5.44609 | 5.74102 | <.0001 |

HMO = health maintenance organization

IND = indemnity plan

PPO = preferred provider organization

EPO = exclusive provider organization

The fitted model coefficients reported here were used to predict odds (or probabilities) of the outcome for different groups of enrollees in different years. Various comparisons were then made between the estimated odds and these comparative odds were reported in the paper. While estimating these odds, all other predictors were assumed to be at their average value or reference value.



**Table 20: Logistic for visual field testing for those under the care of both provider types**

| Model Information           |          |
|-----------------------------|----------|
| Distribution                | Binomial |
| Link Function               | Logit    |
| Number of Observations Used | 310470   |
| Number of Events            | 107822   |
| Number of Trials            | 310470   |
| Missing Values              | 19       |

| Response Profile |                    |                 |
|------------------|--------------------|-----------------|
| Ordered Value    | Dependent variable | Total Frequency |
| 1                | 1                  | 107822          |
| 2                | 0                  | 202648          |

PROC GENMOD is modeling the probability that dependent variable='1'.

| Generalized Estimating Equations Model Information |                 |
|----------------------------------------------------|-----------------|
| Correlation Structure                              | 8-Dependent     |
| Within-Subject Effect                              | year (9 levels) |

| Generalized Estimating Equations Fit Criteria |             |
|-----------------------------------------------|-------------|
| Quasi-likelihood Information Criterion        | 370060.5684 |

| Score Statistics For Type 3 Generalized Estimating Equations Analysis |                    |            |         |
|-----------------------------------------------------------------------|--------------------|------------|---------|
| Source                                                                | Degrees of Freedom | Chi-Square | p-value |
| Year                                                                  | 1                  | 105.25     | <.0001  |
| Year-squared                                                          | 1                  | 19.65      | <.0001  |
| Open-angle glaucoma                                                   | 1                  | 620.51     | <.0001  |
| Year*Open-angle glaucoma                                              | 1                  | 15.7       | <.0001  |
| Year-squared*Open-angle glaucoma                                      | 1                  | 0.35       | 0.5536  |
| Glaucoma suspect                                                      | 1                  | 290.2      | <.0001  |
| Year*Glaucoma suspect                                                 | 1                  | 3.61       | 0.0575  |
| Year-squared*Glaucoma suspect                                         | 1                  | 7.14       | 0.0075  |
| Other nerve conditions                                                | 1                  | 101.31     | <.0001  |
| Year*Other nerve conditions                                           | 1                  | 0.24       | 0.6216  |
| Year-squared*Other nerve conditions                                   | 1                  | 0.05       | 0.8257  |
| Macular Edema                                                         | 1                  | 7.92       | 0.0049  |

|                                                                     |   |         |        |
|---------------------------------------------------------------------|---|---------|--------|
| <b>Exudative Macular degeneration</b>                               | 1 | 37.3    | <.0001 |
| <b>Other retina conditions</b>                                      | 1 | 240.91  | <.0001 |
| <b>Non-Proliferative Diabetic Retinopathy</b>                       | 1 | 12.48   | 0.0004 |
| <b>Proliferative Diabetic Retinopathy</b>                           | 1 | 93.46   | <.0001 |
| <b>Race</b>                                                         | 4 | 37.53   | <.0001 |
| <b>Insurance type</b>                                               | 2 | 25.55   | <.0001 |
| <b>Sex</b>                                                          | 1 | 19.71   | <.0001 |
| <b>Education</b>                                                    | 4 | 8.1     | 0.0878 |
| <b>Household Net Worth</b>                                          | 4 | 40.81   | <.0001 |
| <b>US Region of residence</b>                                       | 4 | 58.23   | <.0001 |
| <b>Insurance plan</b>                                               | 5 | 229.86  | <.0001 |
| <b>Age</b>                                                          | 1 | 13.51   | 0.0002 |
| <b>Obesity</b>                                                      | 1 | 10.16   | 0.0014 |
| <b>Hypertension</b>                                                 | 1 | 0.03    | 0.8645 |
| <b>Hyperlipidemia</b>                                               | 1 | 12.04   | 0.0005 |
| <b>Amount of time the person was covered under the plan (years)</b> | 1 | 3355.83 | <.0001 |

| <b>Parameter estimates</b>             |                 |                              |                               |                                                              |                                                              |                |
|----------------------------------------|-----------------|------------------------------|-------------------------------|--------------------------------------------------------------|--------------------------------------------------------------|----------------|
| <b>Parameter</b>                       | <b>Estimate</b> | <b>Std error of estimate</b> | <b>Exponentiated estimate</b> | <b>95% lower confidence limit for exponentiated estimate</b> | <b>95% upper confidence limit for exponentiated estimate</b> | <b>p-value</b> |
| Intercept                              | -2.4205         | 0.0837                       | 0.08888                       | 0.07543                                                      | 0.10473                                                      | <.0001         |
| Year                                   | -0.2583         | 0.0246                       | 0.77233                       | 0.73604                                                      | 0.81041                                                      | <.0001         |
| Year-squared                           | 0.0118          | 0.0026                       | 1.01182                       | 1.00666                                                      | 1.01701                                                      | <.0001         |
| Open-angle glaucoma                    | 1.3056          | 0.0523                       | 3.69                          | 3.33023                                                      | 4.08865                                                      | <.0001         |
| Year*Open-angle glaucoma               | 0.0953          | 0.0237                       | 1.10003                       | 1.05018                                                      | 1.15225                                                      | <.0001         |
| Year-squared*Open-angle glaucoma       | -0.0015         | 0.0025                       | 0.9985                        | 0.99362                                                      | 1.0034                                                       | 0.5482         |
| Glaucoma suspect                       | 0.9182          | 0.0538                       | 2.50482                       | 2.25412                                                      | 2.7834                                                       | <.0001         |
| Year*Glaucoma suspect                  | -0.0472         | 0.0246                       | 0.95388                       | 0.9089                                                       | 1.00109                                                      | 0.0554         |
| Year-squared*Glaucoma suspect          | 0.007           | 0.0026                       | 1.00707                       | 1.00193                                                      | 1.01224                                                      | 0.0069         |
| Other nerve conditions                 | 0.4177          | 0.0426                       | 1.51844                       | 1.3969                                                       | 1.65056                                                      | <.0001         |
| Year*Other nerve conditions            | -0.0092         | 0.0189                       | 0.99083                       | 0.95479                                                      | 1.02822                                                      | 0.6258         |
| Year-squared*Other nerve conditions    | 0.0004          | 0.002                        | 1.00043                       | 0.9966                                                       | 1.00426                                                      | 0.827          |
| Macular Edema                          | -0.092          | 0.033                        | 0.91211                       | 0.85493                                                      | 0.97312                                                      | 0.0054         |
| Exudative Macular degeneration         | -0.2321         | 0.0387                       | 0.79286                       | 0.73493                                                      | 0.85535                                                      | <.0001         |
| Other retina conditions                | -0.1873         | 0.0122                       | 0.8292                        | 0.80963                                                      | 0.84925                                                      | <.0001         |
| Non-Proliferative Diabetic Retinopathy | -0.084          | 0.024                        | 0.91942                       | 0.87723                                                      | 0.96364                                                      | 0.0005         |
| Proliferative Diabetic Retinopathy     | -0.4005         | 0.042                        | 0.66997                       | 0.61708                                                      | 0.7274                                                       | <.0001         |
| Race: Blacks (vs Whites)               | 0.1196          | 0.021                        | 1.12702                       | 1.08157                                                      | 1.17438                                                      | <.0001         |
| Race: Latinos (vs Whites)              | 0.0151          | 0.0246                       | 1.01525                       | 0.9675                                                       | 1.06535                                                      | 0.5381         |

|                                                              |         |        |         |         |         |        |
|--------------------------------------------------------------|---------|--------|---------|---------|---------|--------|
| Race: Asians (vs Whites)                                     | 0.0808  | 0.0333 | 1.08413 | 1.01554 | 1.15735 | 0.0154 |
| Race: Other races (vs Whites)                                | -0.0055 | 0.0537 | 0.99451 | 0.89514 | 1.10492 | 0.9184 |
| Insurance type: Commercial & Medicaid (vs Commercial only)   | -0.1416 | 0.0482 | 0.86801 | 0.78978 | 0.95398 | 0.0033 |
| Insurance type: Commercial & Medicare (vs Commercial only)   | -0.1163 | 0.0257 | 0.89019 | 0.84641 | 0.93624 | <.0001 |
| Sex: Females (vs Males)                                      | 0.046   | 0.0104 | 1.04703 | 1.02588 | 1.06862 | <.0001 |
| Education: High school diploma (vs less than High School)    | 0.0011  | 0.0447 | 1.0011  | 0.91721 | 1.09265 | 0.9804 |
| Education: Some college (vs less than High School)           | 0.0188  | 0.0452 | 1.01893 | 0.93257 | 1.1133  | 0.6781 |
| Education: College diploma (vs less than High School)        | -0.0139 | 0.0466 | 0.98623 | 0.90021 | 1.08047 | 0.7659 |
| Education: Advanced degree (vs less than High School)        | -0.2165 | 0.1504 | 0.80536 | 0.59978 | 1.0814  | 0.15   |
| Household Net Worth: 25K-75K (vs <25K)                       | 0.0156  | 0.0266 | 1.01568 | 0.96405 | 1.07007 | 0.5589 |
| Household Net Worth: 75K-150K (vs <25K)                      | 0.0165  | 0.023  | 1.01662 | 0.97182 | 1.06349 | 0.4735 |
| Household Net Worth: 150K-500K (vs <25K)                     | 0.0799  | 0.0202 | 1.08319 | 1.0411  | 1.12697 | <.0001 |
| Household Net Worth: >500K (vs <25K)                         | 0.1162  | 0.0235 | 1.12322 | 1.07258 | 1.17625 | <.0001 |
| US Region of residence: South-East (vs North-East)           | 0.0533  | 0.0156 | 1.05471 | 1.02299 | 1.08742 | 0.0006 |
| US Region of residence: Mid-West (vs North-East)             | 0.0479  | 0.0158 | 1.04904 | 1.017   | 1.08209 | 0.0025 |
| US Region of residence: West (vs North-East)                 | 0.1626  | 0.0214 | 1.1766  | 1.12825 | 1.22704 | <.0001 |
| US Region of residence: Other regions (vs North-East)        | 0.032   | 0.2166 | 1.03255 | 0.67541 | 1.57855 | 0.8824 |
| Insurance Plan: PPO (vs HMO)                                 | 0.1904  | 0.0193 | 1.20973 | 1.16477 | 1.25644 | <.0001 |
| Insurance Plan: EPO (vs HMO)                                 | 0.2046  | 0.0205 | 1.22698 | 1.17861 | 1.27733 | <.0001 |
| Insurance Plan: POS (vs HMO)                                 | 0.1994  | 0.0153 | 1.22062 | 1.18457 | 1.25776 | <.0001 |
| Insurance Plan: IND (vs HMO)                                 | 0.1228  | 0.0241 | 1.13069 | 1.07855 | 1.18536 | <.0001 |
| Insurance Plan: Other plans (vs HMO)                         | -0.3336 | 0.0774 | 0.71632 | 0.61553 | 0.83361 | <.0001 |
| Age                                                          | -0.0023 | 0.0006 | 0.99768 | 0.99644 | 0.99892 | 0.0003 |
| Obesity                                                      | -0.0479 | 0.0151 | 0.95324 | 0.92539 | 0.98193 | 0.0015 |
| Hypertension                                                 | 0.0021  | 0.0124 | 1.0021  | 0.97811 | 1.02667 | 0.8653 |
| Hyperlipidemia                                               | 0.043   | 0.0125 | 1.04396 | 1.01872 | 1.06982 | 0.0006 |
| Amount of time the person was covered under the plan (years) | 1.5763  | 0.0288 | 4.83696 | 4.57156 | 5.11776 | <.0001 |

HMO = health maintenance organization  
IND = indemnity plan  
PPO = preferred provider organization  
EPO = exclusive provider organization

The fitted model coefficients reported here were used to predict odds (or probabilities) of the outcome for different groups of enrollees in different years. Various comparisons were then made between the estimated odds and these comparative odds were reported in the paper. While estimating these odds, all other predictors were assumed to be at their average value or reference value.

**Table 21: Logistic for visual field testing, including all provider types**

| Model Information           |          |
|-----------------------------|----------|
| Distribution                | Binomial |
| Link Function               | Logit    |
| Number of Observations Used | 1634251  |
| Number of Events            | 552916   |
| Number of Trials            | 1634251  |
| Missing Values              | 161      |

| Response Profile |                    |                 |
|------------------|--------------------|-----------------|
| Ordered Value    | Dependent variable | Total Frequency |
| 1                | 1                  | 552916          |
| 2                | 0                  | 1081335         |

PROC GENMOD is modeling the probability that dependent variable='1'.

| Generalized Estimating Equations Model Information |                 |
|----------------------------------------------------|-----------------|
| Correlation Structure                              | 8-Dependent     |
| Within-Subject Effect                              | year (9 levels) |

| Generalized Estimating Equations Fit Criteria |             |
|-----------------------------------------------|-------------|
| Quasi-likelihood Information Criterion        | 1937717.273 |

| Score Statistics For Type 3 Generalized Estimating Equations Analysis |                    |            |         |
|-----------------------------------------------------------------------|--------------------|------------|---------|
| Source                                                                | Degrees of Freedom | Chi-Square | p-value |
| Year                                                                  | 1                  | 311.6      | <.0001  |
| Year-squared                                                          | 1                  | 44.98      | <.0001  |
| Open-angle glaucoma                                                   | 1                  | 3838.52    | <.0001  |
| Year*Open-angle glaucoma                                              | 1                  | 17.44      | <.0001  |
| Year-squared*Open-angle glaucoma                                      | 1                  | 1.82       | 0.1778  |
| Glaucoma suspect                                                      | 1                  | 1606.86    | <.0001  |
| Year*Glaucoma suspect                                                 | 1                  | 8.94       | 0.0028  |
| Year-squared*Glaucoma suspect                                         | 1                  | 13.93      | 0.0002  |
| Other nerve conditions                                                | 1                  | 608.57     | <.0001  |
| Year*Other nerve conditions                                           | 1                  | 13.76      | 0.0002  |
| Year-squared*Other nerve conditions                                   | 1                  | 6.39       | 0.0115  |
| Macular Edema                                                         | 1                  | 23.55      | <.0001  |
| Exudative Macular degeneration                                        | 1                  | 86.6       | <.0001  |

|                                                                     |   |         |        |
|---------------------------------------------------------------------|---|---------|--------|
| <b>Other retina conditions</b>                                      | 1 | 929.37  | <.0001 |
| <b>Non-Proliferative Diabetic Retinopathy</b>                       | 1 | 5.76    | 0.0164 |
| <b>Proliferative Diabetic Retinopathy</b>                           | 1 | 442.95  | <.0001 |
| <b>Race</b>                                                         | 4 | 135.4   | <.0001 |
| <b>Insurance type</b>                                               | 2 | 151.12  | <.0001 |
| <b>Sex</b>                                                          | 1 | 161.63  | <.0001 |
| <b>Education</b>                                                    | 4 | 96.98   | <.0001 |
| <b>Household Net Worth</b>                                          | 4 | 211.35  | <.0001 |
| <b>US Region of residence</b>                                       | 4 | 152.89  | <.0001 |
| <b>Insurance plan</b>                                               | 5 | 734.1   | <.0001 |
| <b>Age</b>                                                          | 1 | 0.04    | 0.8415 |
| <b>Obesity</b>                                                      | 1 | 46.02   | <.0001 |
| <b>Hypertension</b>                                                 | 1 | 6.68    | 0.0098 |
| <b>Hyperlipidemia</b>                                               | 1 | 123.8   | <.0001 |
| <b>Amount of time the person was covered under the plan (years)</b> | 1 | 24766.8 | <.0001 |
| <b>Eye-care</b>                                                     | 3 | 366.29  | <.0001 |

| <b>Parameter estimates</b>             |                 |                              |                               |                                                              |                                                              |                |
|----------------------------------------|-----------------|------------------------------|-------------------------------|--------------------------------------------------------------|--------------------------------------------------------------|----------------|
| <b>Parameter</b>                       | <b>Estimate</b> | <b>Std error of estimate</b> | <b>Exponentiated estimate</b> | <b>95% lower confidence limit for exponentiated estimate</b> | <b>95% upper confidence limit for exponentiated estimate</b> | <b>p-value</b> |
| Intercept                              | -2.815          | 0.0361                       | 0.0599                        | 0.05581                                                      | 0.06429                                                      | <.0001         |
| Year                                   | -0.2061         | 0.0114                       | 0.81374                       | 0.79578                                                      | 0.83209                                                      | <.0001         |
| Year-squared                           | 0.0083          | 0.0012                       | 1.00832                       | 1.00593                                                      | 1.01073                                                      | <.0001         |
| Open-angle glaucoma                    | 1.505           | 0.0242                       | 4.50419                       | 4.2954                                                       | 4.72314                                                      | <.0001         |
| Year*Open-angle glaucoma               | 0.0472          | 0.0111                       | 1.0483                        | 1.02571                                                      | 1.07139                                                      | <.0001         |
| Year-squared*Open-angle glaucoma       | 0.0016          | 0.0012                       | 1.00162                       | 0.9993                                                       | 1.00394                                                      | 0.1717         |
| Glaucoma suspect                       | 0.9851          | 0.0245                       | 2.67798                       | 2.55238                                                      | 2.80977                                                      | <.0001         |
| Year*Glaucoma suspect                  | -0.0345         | 0.0114                       | 0.96613                       | 0.94481                                                      | 0.98794                                                      | 0.0025         |
| Year-squared*Glaucoma suspect          | 0.0046          | 0.0012                       | 1.0046                        | 1.00221                                                      | 1.007                                                        | 0.0002         |
| Other nerve conditions                 | 0.4659          | 0.0194                       | 1.59347                       | 1.53409                                                      | 1.65514                                                      | <.0001         |
| Year*Other nerve conditions            | -0.032          | 0.0088                       | 0.96848                       | 0.95201                                                      | 0.98523                                                      | 0.0003         |
| Year-squared*Other nerve conditions    | 0.0023          | 0.0009                       | 1.00229                       | 1.0005                                                       | 1.00408                                                      | 0.0122         |
| Macular Edema                          | -0.0868         | 0.018                        | 0.91687                       | 0.88502                                                      | 0.94987                                                      | <.0001         |
| Exudative Macular degeneration         | -0.2033         | 0.0222                       | 0.816                         | 0.7812                                                       | 0.85235                                                      | <.0001         |
| Other retina conditions                | -0.1772         | 0.0059                       | 0.83758                       | 0.82795                                                      | 0.84731                                                      | <.0001         |
| Non-Proliferative Diabetic Retinopathy | -0.0265         | 0.0111                       | 0.97383                       | 0.95284                                                      | 0.99528                                                      | 0.0171         |
| Proliferative Diabetic Retinopathy     | -0.4292         | 0.0207                       | 0.65106                       | 0.62517                                                      | 0.67801                                                      | <.0001         |
| Race: Blacks (vs Whites)               | 0.072           | 0.0088                       | 1.0747                        | 1.0564                                                       | 1.09333                                                      | <.0001         |
| Race: Latinos (vs Whites)              | 0.0221          | 0.0095                       | 1.02234                       | 1.0035                                                       | 1.04154                                                      | 0.0199         |
| Race: Asians (vs Whites)               | 0.1072          | 0.0126                       | 1.11314                       | 1.08601                                                      | 1.14094                                                      | <.0001         |

|                                                                               |         |        |         |         |         |        |
|-------------------------------------------------------------------------------|---------|--------|---------|---------|---------|--------|
| Race: Other races (vs Whites)                                                 | 0.0146  | 0.0228 | 1.01469 | 0.9703  | 1.0611  | 0.5229 |
| Insurance type: Commercial & Medicaid (vs Commercial only)                    | -0.0731 | 0.0233 | 0.92955 | 0.888   | 0.97304 | 0.0017 |
| Insurance type: Commercial & Medicare (vs Commercial only)                    | -0.141  | 0.0116 | 0.86848 | 0.84889 | 0.88853 | <.0001 |
| Sex: Females (vs Males)                                                       | 0.0566  | 0.0045 | 1.05819 | 1.04895 | 1.06752 | <.0001 |
| Education: High school diploma (vs less than High School)                     | -0.0266 | 0.018  | 0.97377 | 0.93993 | 1.00882 | 0.1407 |
| Education: Some college (vs less than High School)                            | -0.004  | 0.0183 | 0.99605 | 0.96101 | 1.03236 | 0.8283 |
| Education: College diploma (vs less than High School)                         | -0.0616 | 0.0189 | 0.9403  | 0.90619 | 0.97569 | 0.0011 |
| Education: Advanced degree (vs less than High School)                         | -0.1207 | 0.0452 | 0.88628 | 0.81116 | 0.96835 | 0.0075 |
| Household Net Worth: 25K-75K (vs <25K)                                        | 0.0174  | 0.0117 | 1.01753 | 0.99447 | 1.04113 | 0.1374 |
| Household Net Worth: 75K-150K (vs <25K)                                       | 0.0367  | 0.0101 | 1.03734 | 1.01698 | 1.0581  | 0.0003 |
| Household Net Worth: 150K-500K (vs <25K)                                      | 0.0905  | 0.0089 | 1.09469 | 1.07583 | 1.11388 | <.0001 |
| Household Net Worth: >500K (vs <25K)                                          | 0.1204  | 0.0102 | 1.128   | 1.1057  | 1.15075 | <.0001 |
| US Region of residence: South-East (vs North-East)                            | 0.0254  | 0.0064 | 1.02569 | 1.01282 | 1.03873 | <.0001 |
| US Region of residence: Mid-West (vs North-East)                              | 0.0306  | 0.0068 | 1.03103 | 1.0173  | 1.04495 | <.0001 |
| US Region of residence: West (vs North-East)                                  | 0.1002  | 0.0084 | 1.10536 | 1.08736 | 1.12365 | <.0001 |
| US Region of residence: Other regions (vs North-East)                         | -0.1088 | 0.0845 | 0.89695 | 0.76008 | 1.05847 | 0.198  |
| Insurance Plan: PPO (vs HMO)                                                  | 0.0848  | 0.0082 | 1.08846 | 1.07101 | 1.1062  | <.0001 |
| Insurance Plan: EPO (vs HMO)                                                  | 0.1729  | 0.0091 | 1.18875 | 1.16774 | 1.21013 | <.0001 |
| Insurance Plan: POS (vs HMO)                                                  | 0.1516  | 0.0069 | 1.16366 | 1.14814 | 1.17939 | <.0001 |
| Insurance Plan: IND (vs HMO)                                                  | 0.0469  | 0.0111 | 1.04802 | 1.0255  | 1.07103 | <.0001 |
| Insurance Plan: Other plans (vs HMO)                                          | -0.2971 | 0.0369 | 0.74299 | 0.69115 | 0.79872 | <.0001 |
| Age                                                                           | 0.0001  | 0.0003 | 1.00005 | 0.99952 | 1.00059 | 0.8421 |
| Obesity                                                                       | -0.046  | 0.0068 | 0.95508 | 0.94238 | 0.96794 | <.0001 |
| Hypertension                                                                  | 0.0135  | 0.0053 | 1.01362 | 1.00321 | 1.02415 | 0.0102 |
| Hyperlipidemia                                                                | 0.0583  | 0.0053 | 1.06006 | 1.04915 | 1.07108 | <.0001 |
| Amount of time the person was covered under the plan (years)                  | 1.6412  | 0.011  | 5.16151 | 5.05104 | 5.27439 | <.0001 |
| Eye-care: Visited unspecified eye provider (vs visited ophthalmologists only) | -0.3528 | 0.0323 | 0.70272 | 0.65957 | 0.7487  | <.0001 |
| Eye-care: Visited optometrists only (vs visited ophthalmologists only)        | 0.084   | 0.0064 | 1.0876  | 1.07396 | 1.1014  | <.0001 |
| Eye-care: Visited both (vs visited ophthalmologists only)                     | 0.0566  | 0.0058 | 1.05827 | 1.04625 | 1.07042 | <.0001 |

HMO = health maintenance organization  
IND = indemnity plan

PPO = preferred provider organization  
EPO = exclusive provider organization

The fitted model coefficients reported here were used to predict odds (or probabilities) of the outcome for different groups of enrollees in different years. Various comparisons were then made between the estimated odds and these comparative odds were reported in the paper. While estimating these odds, all other predictors were assumed to be at their average value or reference value.



**Table 22: Logistic for visual field testing including all provider types, but only in open-angle glaucoma patients**

| Model Information           |          |
|-----------------------------|----------|
| Distribution                | Binomial |
| Link Function               | Logit    |
| Number of Observations Used | 463782   |
| Number of Events            | 241734   |
| Number of Trials            | 463782   |
| Missing Values              | 46       |

| Response Profile |                    |                 |
|------------------|--------------------|-----------------|
| Ordered Value    | Dependent variable | Total Frequency |
| 1                | 1                  | 241734          |
| 2                | 0                  | 222048          |

PROC GENMOD is modeling the probability that dependent variable='1'.

| Generalized Estimating Equations Model Information |                 |
|----------------------------------------------------|-----------------|
| Correlation Structure                              | 8-Dependent     |
| Within-Subject Effect                              | year (9 levels) |

| Generalized Estimating Equations Fit Criteria |             |
|-----------------------------------------------|-------------|
| Quasi-likelihood Information Criterion        | 620880.7074 |

| Score Statistics For Type 3 Generalized Estimating Equations Analysis |                    |            |         |
|-----------------------------------------------------------------------|--------------------|------------|---------|
| Source                                                                | Degrees of Freedom | Chi-Square | p-value |
| Year                                                                  | 1                  | 584.08     | <.0001  |
| Year-squared                                                          | 1                  | 181.13     | <.0001  |
| Other nerve conditions                                                | 1                  | 115.82     | <.0001  |
| Year*Other nerve conditions                                           | 1                  | 10.52      | 0.0012  |
| Year-squared*Other nerve conditions                                   | 1                  | 12.12      | 0.0005  |
| Macular Edema                                                         | 1                  | 93.39      | <.0001  |
| Exudative Macular degeneration                                        | 1                  | 106.63     | <.0001  |
| Other retina conditions                                               | 1                  | 43.91      | <.0001  |
| Non-Proliferative Diabetic Retinopathy                                | 1                  | 61.14      | <.0001  |
| Proliferative Diabetic Retinopathy                                    | 1                  | 304.43     | <.0001  |
| Race                                                                  | 4                  | 50.99      | <.0001  |
| Insurance type                                                        | 2                  | 63.66      | <.0001  |

|                                                                     |   |         |        |
|---------------------------------------------------------------------|---|---------|--------|
| <b>Sex</b>                                                          | 1 | 43.25   | <.0001 |
| <b>Education</b>                                                    | 4 | 17.35   | 0.0017 |
| <b>Household Net Worth</b>                                          | 4 | 280.16  | <.0001 |
| <b>US Region of residence</b>                                       | 4 | 49.8    | <.0001 |
| <b>Insurance plan</b>                                               | 5 | 284.54  | <.0001 |
| <b>Age</b>                                                          | 1 | 49.51   | <.0001 |
| <b>Obesity</b>                                                      | 1 | 58.1    | <.0001 |
| <b>Hypertension</b>                                                 | 1 | 31.39   | <.0001 |
| <b>Hyperlipidemia</b>                                               | 1 | 176.59  | <.0001 |
| <b>Amount of time the person was covered under the plan (years)</b> | 1 | 12580.2 | <.0001 |
| <b>Eye-care</b>                                                     | 3 | 116.48  | <.0001 |

| <b>Parameter estimates</b>                                 |                 |                              |                               |                                                              |                                                              |                |
|------------------------------------------------------------|-----------------|------------------------------|-------------------------------|--------------------------------------------------------------|--------------------------------------------------------------|----------------|
| <b>Parameter</b>                                           | <b>Estimate</b> | <b>Std error of estimate</b> | <b>Exponentiated estimate</b> | <b>95% lower confidence limit for exponentiated estimate</b> | <b>95% upper confidence limit for exponentiated estimate</b> | <b>p-value</b> |
| Intercept                                                  | -1.6541         | 0.0464                       | 0.19127                       | 0.17464                                                      | 0.20949                                                      | <.0001         |
| Year                                                       | -0.1392         | 0.0058                       | 0.87008                       | 0.86023                                                      | 0.88004                                                      | <.0001         |
| Year-squared                                               | 0.0086          | 0.0006                       | 1.0086                        | 1.00733                                                      | 1.00986                                                      | <.0001         |
| Other nerve conditions                                     | 0.2722          | 0.0259                       | 1.31287                       | 1.24779                                                      | 1.38134                                                      | <.0001         |
| Year*Other nerve conditions                                | -0.038          | 0.0119                       | 0.96268                       | 0.94053                                                      | 0.98535                                                      | 0.0014         |
| Year-squared*Other nerve conditions                        | 0.0043          | 0.0013                       | 1.00433                       | 1.00187                                                      | 1.0068                                                       | 0.0006         |
| Macular Edema                                              | -0.2652         | 0.0271                       | 0.76707                       | 0.72738                                                      | 0.80892                                                      | <.0001         |
| Exudative Macular degeneration                             | -0.3256         | 0.0313                       | 0.72209                       | 0.67914                                                      | 0.76776                                                      | <.0001         |
| Other retina conditions                                    | -0.0667         | 0.0101                       | 0.93544                       | 0.91714                                                      | 0.9541                                                       | <.0001         |
| Non-Proliferative Diabetic Retinopathy                     | -0.1353         | 0.0172                       | 0.87342                       | 0.84446                                                      | 0.90338                                                      | <.0001         |
| Proliferative Diabetic Retinopathy                         | -0.5146         | 0.0289                       | 0.59772                       | 0.56479                                                      | 0.63257                                                      | <.0001         |
| Race: Blacks (vs Whites)                                   | 0.0454          | 0.0133                       | 1.04649                       | 1.01958                                                      | 1.0741                                                       | 0.0006         |
| Race: Latinos (vs Whites)                                  | -0.0135         | 0.0172                       | 0.98655                       | 0.95386                                                      | 1.02036                                                      | 0.4308         |
| Race: Asians (vs Whites)                                   | 0.1508          | 0.0246                       | 1.16278                       | 1.10798                                                      | 1.2203                                                       | <.0001         |
| Race: Other races (vs Whites)                              | -0.01           | 0.0415                       | 0.99004                       | 0.91274                                                      | 1.07388                                                      | 0.8092         |
| Insurance type: Commercial & Medicaid (vs Commercial only) | -0.2631         | 0.0389                       | 0.76865                       | 0.71228                                                      | 0.82948                                                      | <.0001         |
| Insurance type: Commercial & Medicare (vs Commercial only) | -0.0959         | 0.0179                       | 0.90853                       | 0.87724                                                      | 0.94095                                                      | <.0001         |
| Sex: Females (vs Males)                                    | 0.0513          | 0.0078                       | 1.05266                       | 1.03663                                                      | 1.06893                                                      | <.0001         |

|                                                                               |         |        |         |         |         |        |
|-------------------------------------------------------------------------------|---------|--------|---------|---------|---------|--------|
| Education: High school diploma (vs less than High School)                     | -0.0088 | 0.0289 | 0.99128 | 0.93667 | 1.04909 | 0.7621 |
| Education: Some college (vs less than High School)                            | 0.0224  | 0.0295 | 1.02262 | 0.96526 | 1.08339 | 0.4475 |
| Education: College diploma (vs less than High School)                         | -0.0139 | 0.0308 | 0.9862  | 0.92849 | 1.0475  | 0.6516 |
| Education: Advanced degree (vs less than High School)                         | -0.0789 | 0.0902 | 0.92409 | 0.77436 | 1.10277 | 0.3814 |
| Household Net Worth: 25K-75K (vs <25K)                                        | 0.0389  | 0.0197 | 1.03963 | 1.00032 | 1.08049 | 0.0481 |
| Household Net Worth: 75K-150K (vs <25K)                                       | 0.0808  | 0.017  | 1.08413 | 1.04852 | 1.12095 | <.0001 |
| Household Net Worth: 150K-500K (vs <25K)                                      | 0.1712  | 0.0149 | 1.18675 | 1.15262 | 1.22189 | <.0001 |
| Household Net Worth: >500K (vs <25K)                                          | 0.2532  | 0.0175 | 1.28818 | 1.24484 | 1.33302 | <.0001 |
| US Region of residence: South-East (vs North-East)                            | 0.0131  | 0.0116 | 1.01323 | 0.99036 | 1.03662 | 0.2592 |
| US Region of residence: Mid-West (vs North-East)                              | 0.0711  | 0.0124 | 1.07364 | 1.04777 | 1.10015 | <.0001 |
| US Region of residence: West (vs North-East)                                  | 0.0511  | 0.0152 | 1.05243 | 1.02159 | 1.08419 | 0.0008 |
| US Region of residence: Other regions (vs North-East)                         | 0.0261  | 0.1537 | 1.02643 | 0.75944 | 1.38727 | 0.8652 |
| Insurance Plan: PPO (vs HMO)                                                  | 0.08    | 0.0145 | 1.0833  | 1.05294 | 1.11454 | <.0001 |
| Insurance Plan: EPO (vs HMO)                                                  | 0.1785  | 0.0171 | 1.19546 | 1.15617 | 1.23609 | <.0001 |
| Insurance Plan: POS (vs HMO)                                                  | 0.1523  | 0.0127 | 1.16454 | 1.13581 | 1.194   | <.0001 |
| Insurance Plan: IND (vs HMO)                                                  | 0.0221  | 0.0175 | 1.02239 | 0.988   | 1.05797 | 0.2047 |
| Insurance Plan: Other plans (vs HMO)                                          | -0.3765 | 0.0487 | 0.68629 | 0.62386 | 0.75495 | <.0001 |
| Age                                                                           | -0.0033 | 0.0005 | 0.99672 | 0.99581 | 0.99763 | <.0001 |
| Obesity                                                                       | -0.0926 | 0.0121 | 0.91157 | 0.89015 | 0.93351 | <.0001 |
| Hypertension                                                                  | -0.0548 | 0.0098 | 0.94669 | 0.92864 | 0.96508 | <.0001 |
| Hyperlipidemia                                                                | 0.1257  | 0.0095 | 1.13392 | 1.11308 | 1.15514 | <.0001 |
| Amount of time the person was covered under the plan (years)                  | 2.1749  | 0.0188 | 8.80131 | 8.48314 | 9.1314  | <.0001 |
| Eye-care: Visited unspecified eye provider (vs visited ophthalmologists only) | -0.5053 | 0.064  | 0.6033  | 0.53215 | 0.68396 | <.0001 |
| Eye-care: Visited optometrists only (vs visited ophthalmologists only)        | -0.1084 | 0.0149 | 0.89728 | 0.8715  | 0.92382 | <.0001 |
| Eye-care: Visited both (vs visited ophthalmologists only)                     | 0.0158  | 0.0098 | 1.01588 | 0.9965  | 1.03564 | 0.1088 |

HMO = health maintenance organization  
IND = indemnity plan  
PPO = preferred provider organization  
EPO = exclusive provider organization

The fitted model coefficients reported here were used to predict odds (or probabilities) of the outcome for different groups of enrollees in different years. Various comparisons were then made between the estimated odds and these comparative odds were reported in the paper. While estimating these odds, all other predictors were assumed to be at their average value or reference value.
